# Supplementary material
Source: PubMed Central journal article supplement (PMC6894181)

## SUPPORTING INFORMATION

### Iodine-Catalyzed Functionalization of Primary Aliphatic Amines to Oxazoles, 1,4-Oxazines, and Oxazinones

Sudipto Debnath,<sup>a</sup> Tuluma Das,<sup>a</sup> Subrata Gayen,<sup>a</sup> Tapas Ghosh<sup>b</sup> and  
Dilip K. Maiti<sup>\*,a</sup>

<sup>a</sup>Department of Chemistry, University of Calcutta, 92 A. P. C. Road,  
Kolkata-700009, India.

<sup>b</sup>Department of Applied Sciences, Maulana Abul Kalam Azad University of  
Technology, Haringhata-741249, West Bengal, India.

#### *Table of Contents*

|                    |                                                             |     |
|--------------------|-------------------------------------------------------------|-----|
| <b>Section I</b>   | <sup>1</sup> H and <sup>13</sup> C NMR spectra              | S2  |
| <b>Section II</b>  | X-ray diffraction data of compounds <b>4j</b> and <b>6a</b> | S32 |
| <b>Section III</b> | Mass spectral data                                          | S36 |

# Section I: $^1\text{H}$ and $^{13}\text{C}$ NMR spectra

## Figure S1. $^1\text{H}$ and $^{13}\text{C}$ NMR of 4a

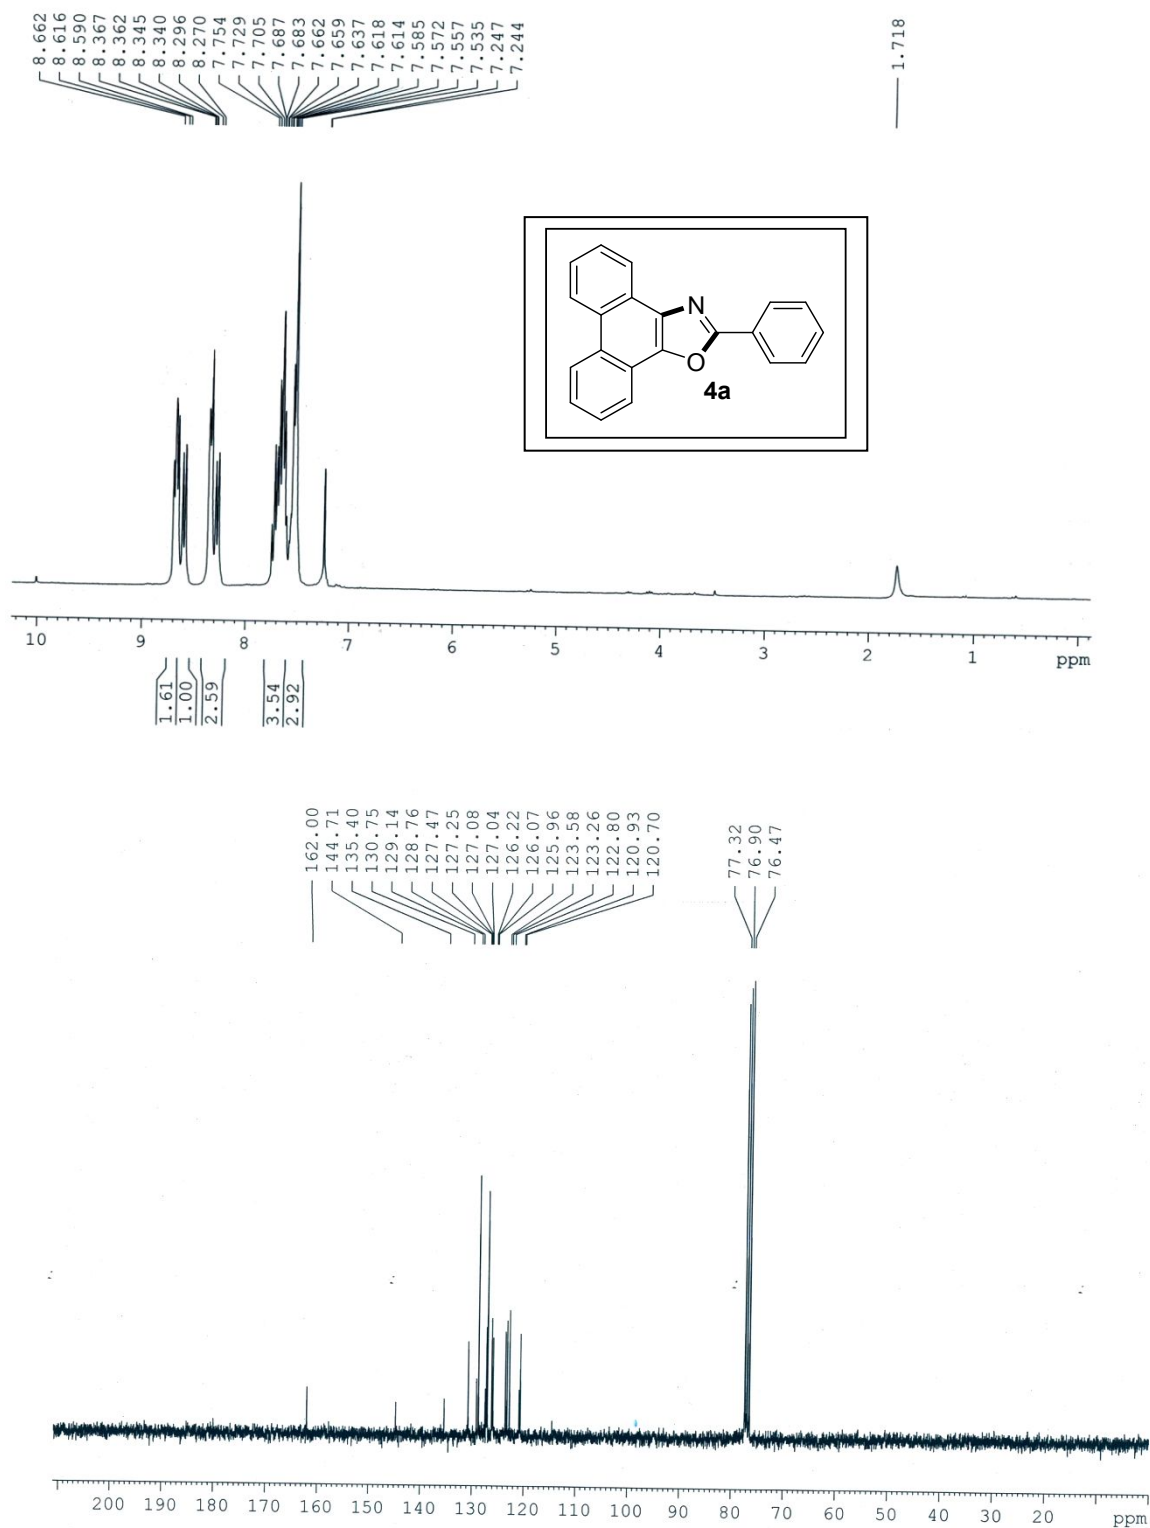

Figure S2. <sup>1</sup>H and <sup>13</sup>C NMR of 4b

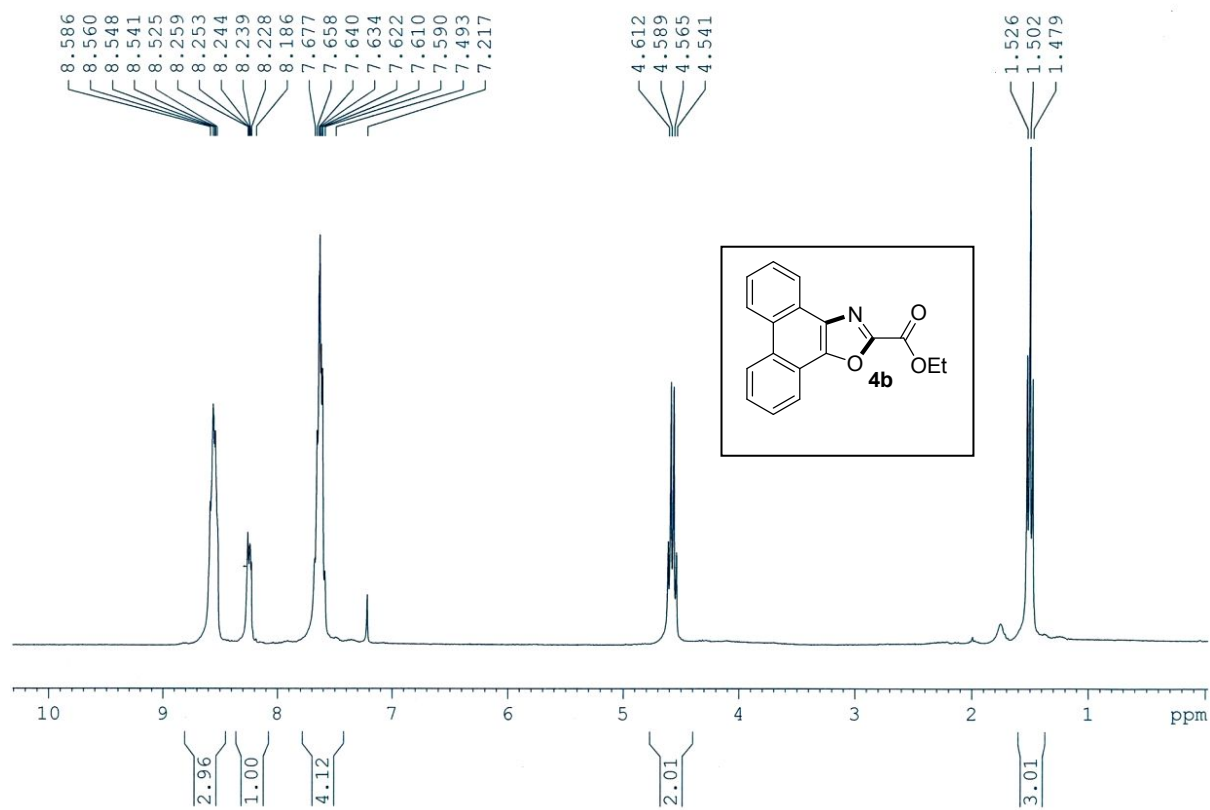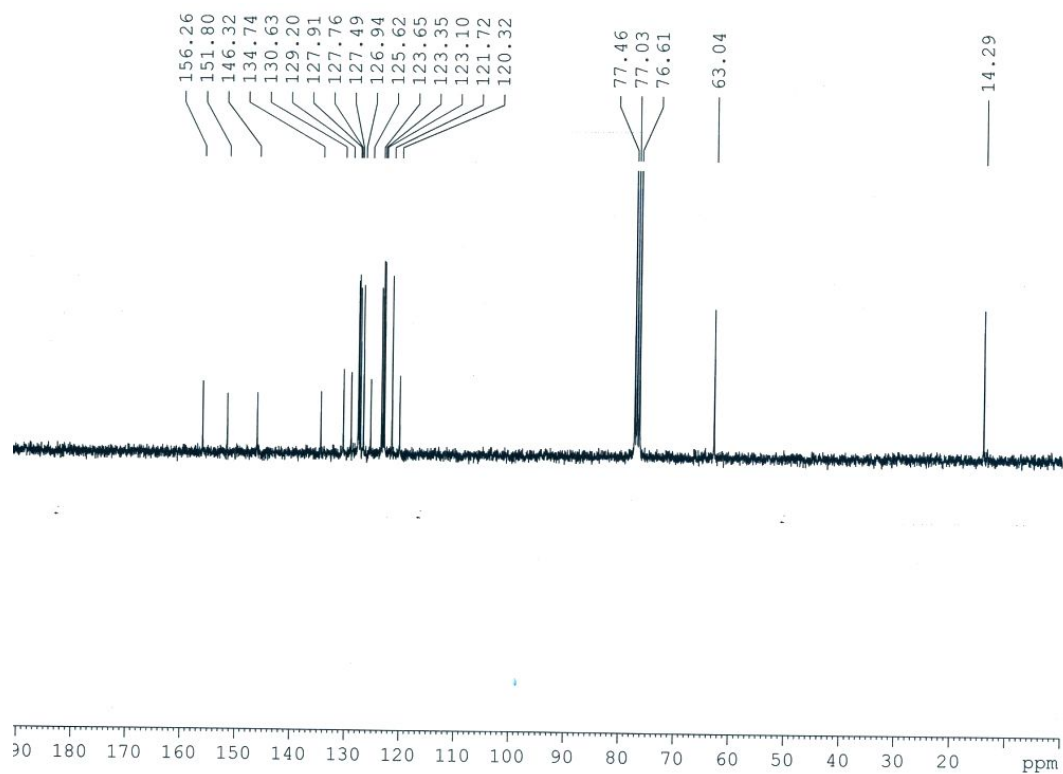

Figure S3.  $^1\text{H}$  and  $^{13}\text{C}$  NMR of **4c**

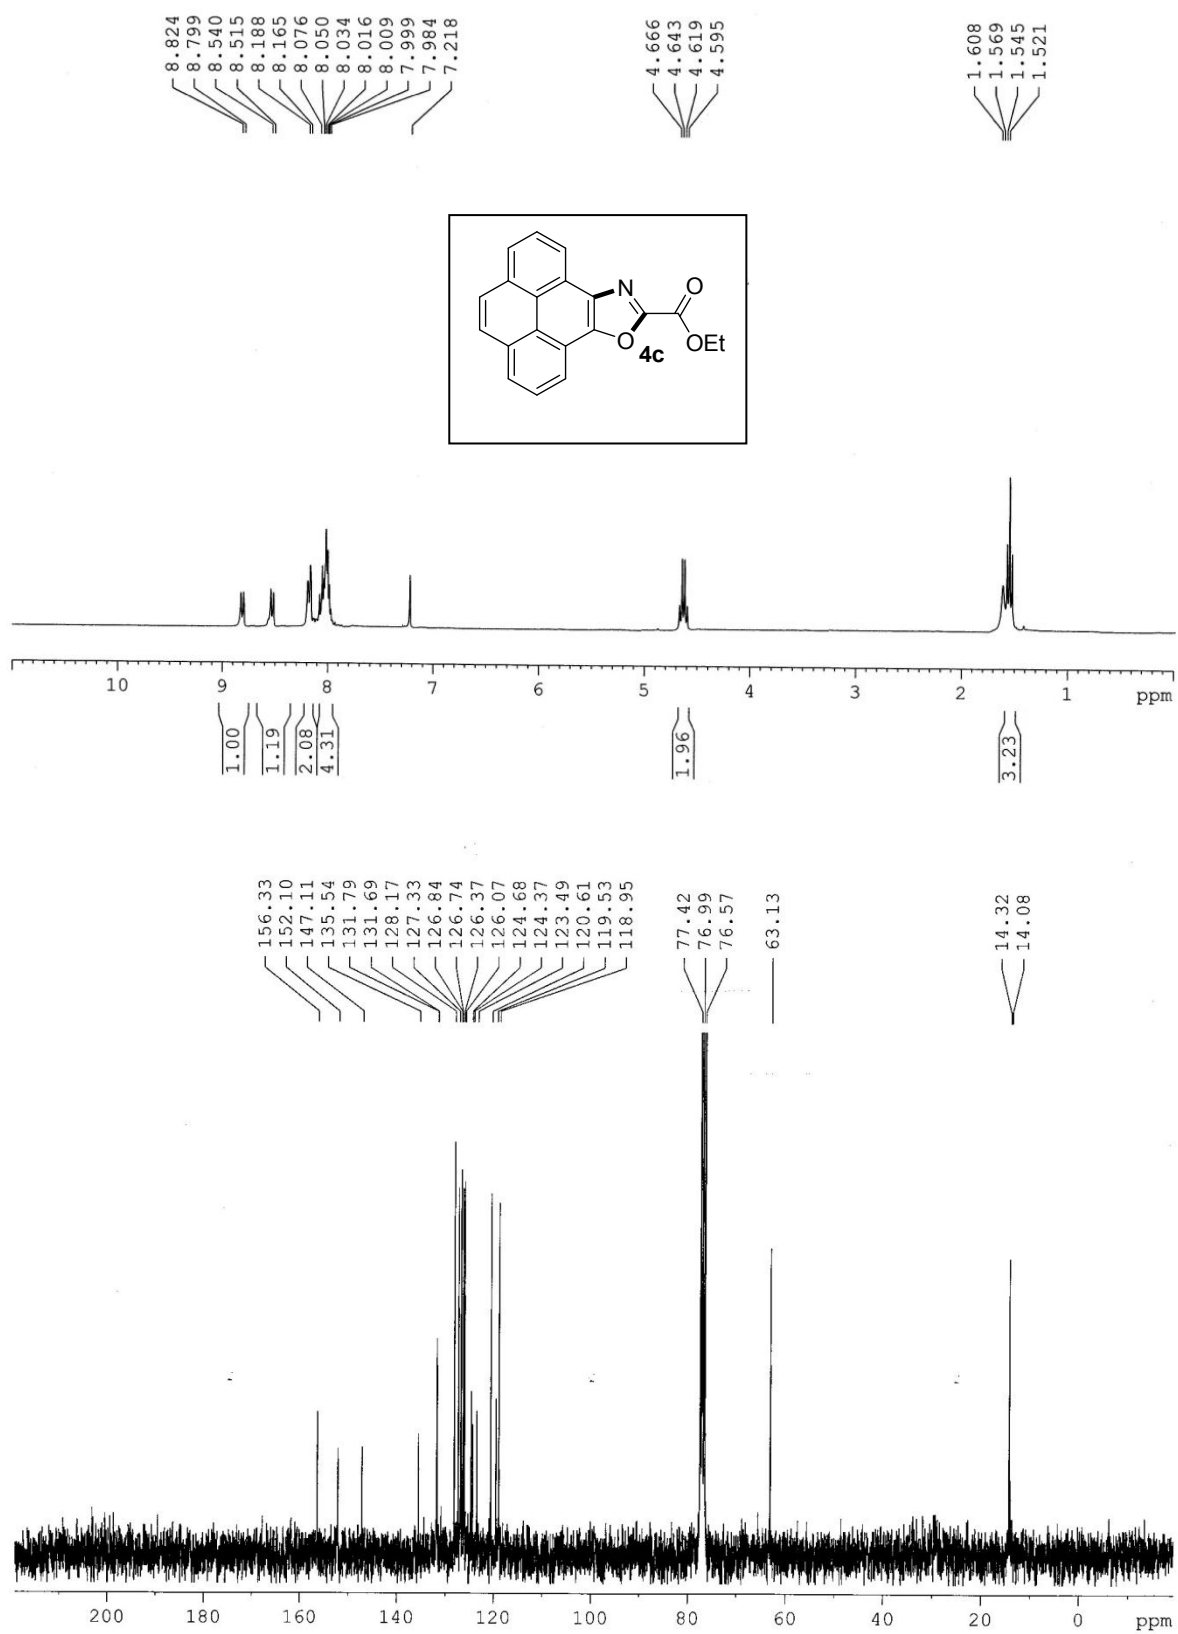

Figure S4.  $^1\text{H}$  and  $^{13}\text{C}$  NMR of 4d

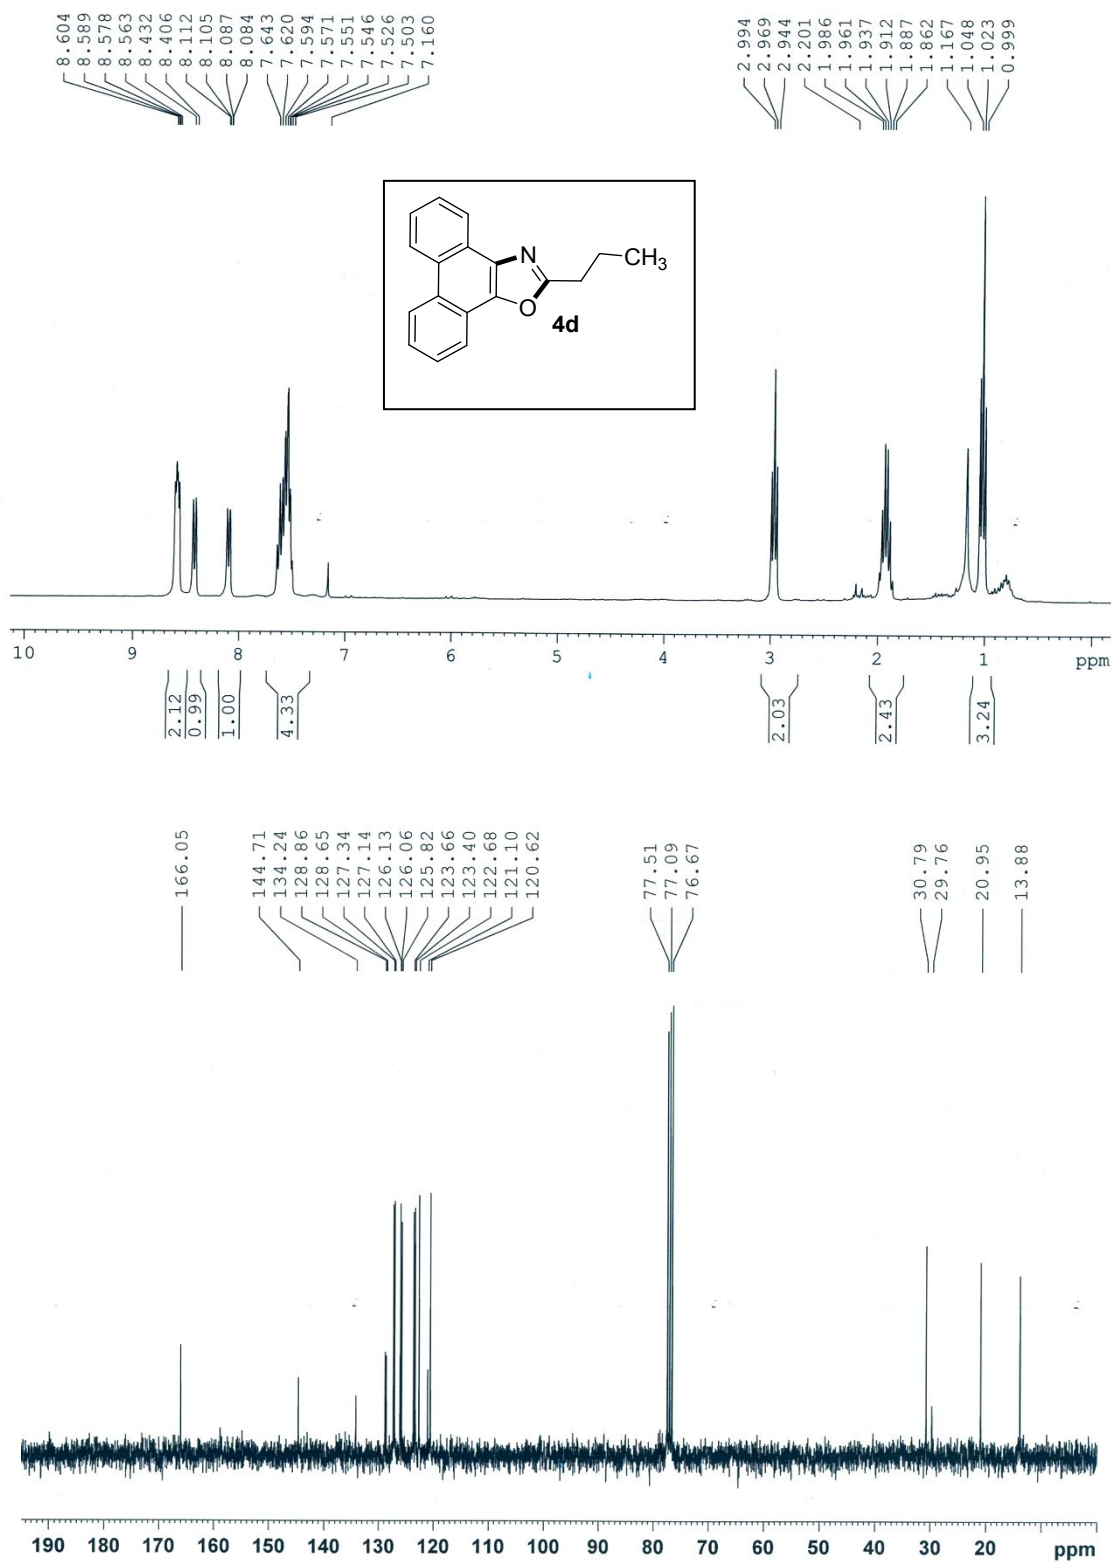

Figure S5.  $^1\text{H}$  and  $^{13}\text{C}$  NMR of 4e

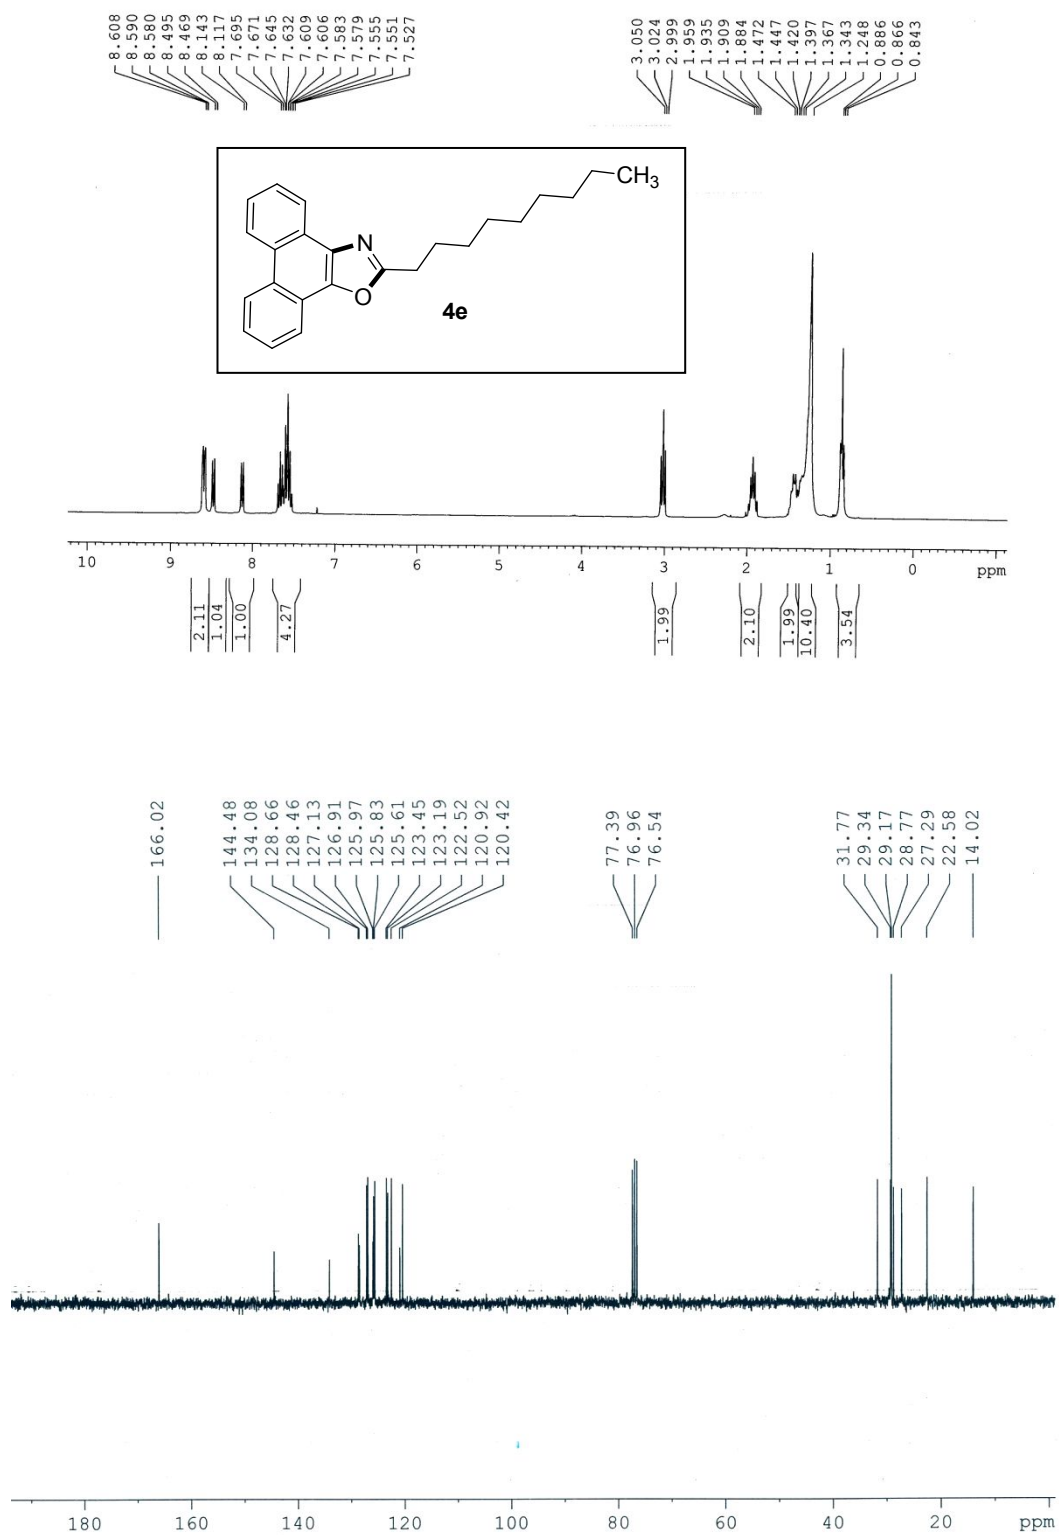

Figure S6.  $^1\text{H}$  and  $^{13}\text{C}$  NMR of 4f

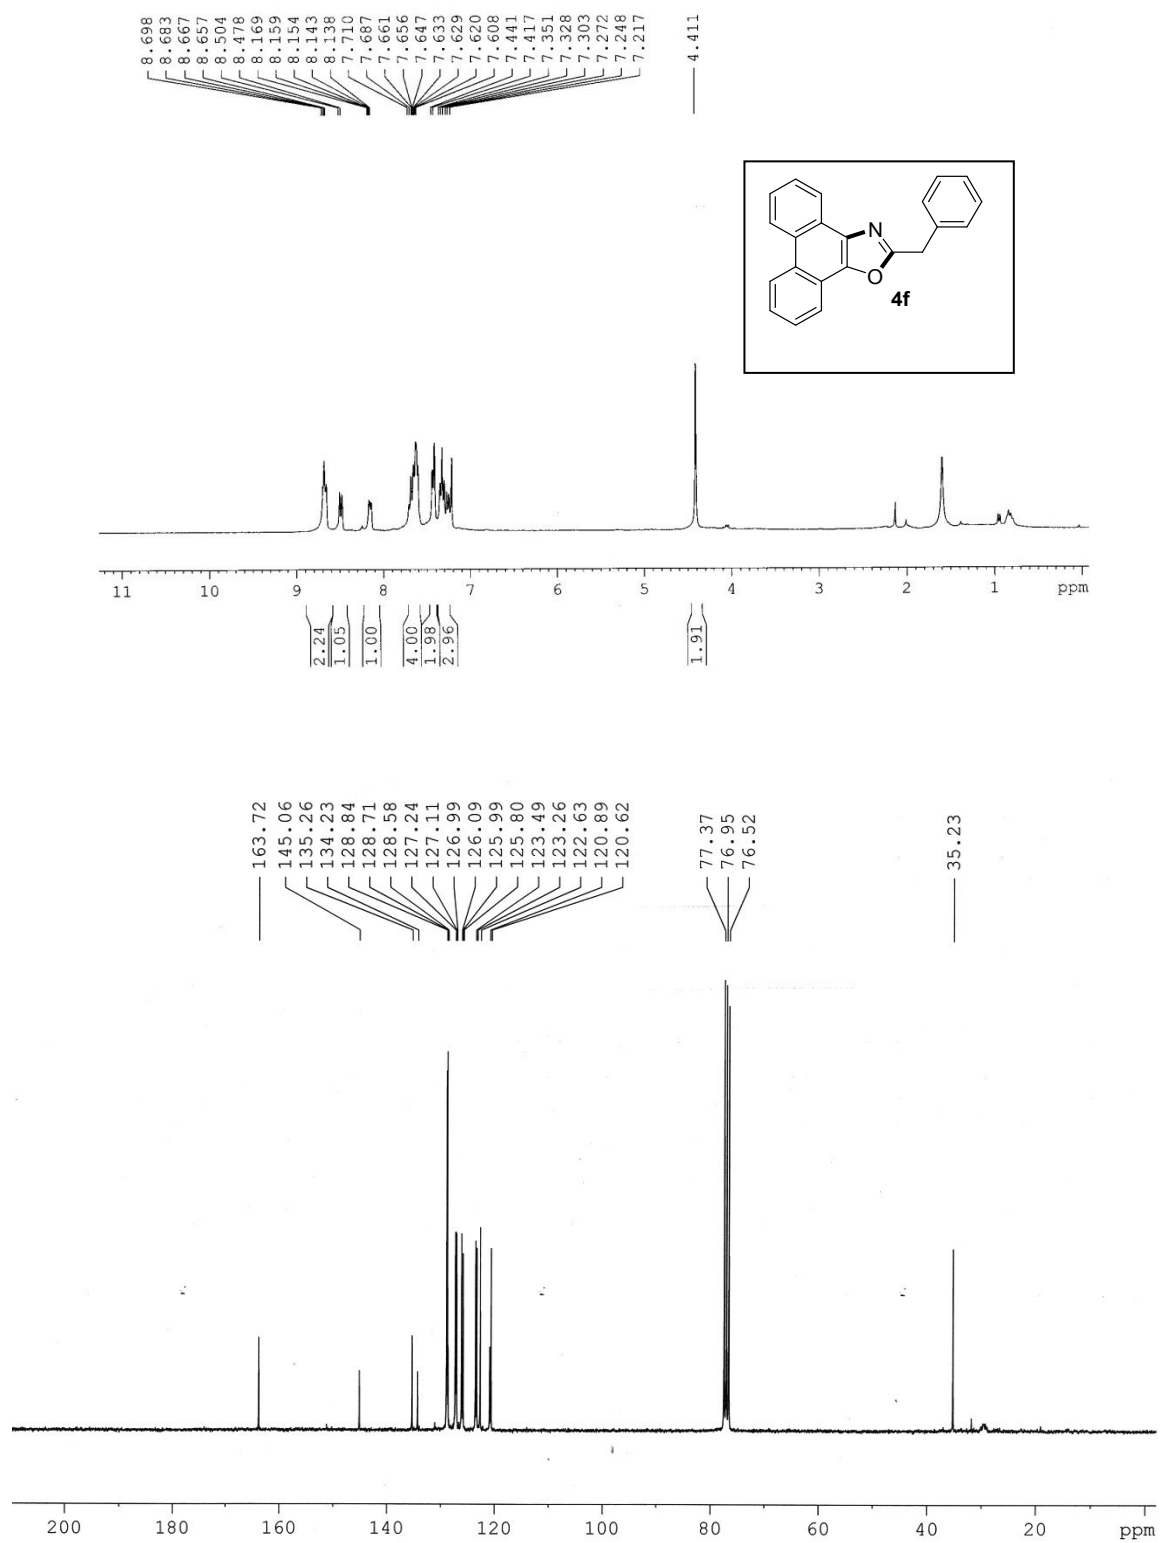

Figure S7.  $^1\text{H}$  and  $^{13}\text{C}$  NMR of 4g

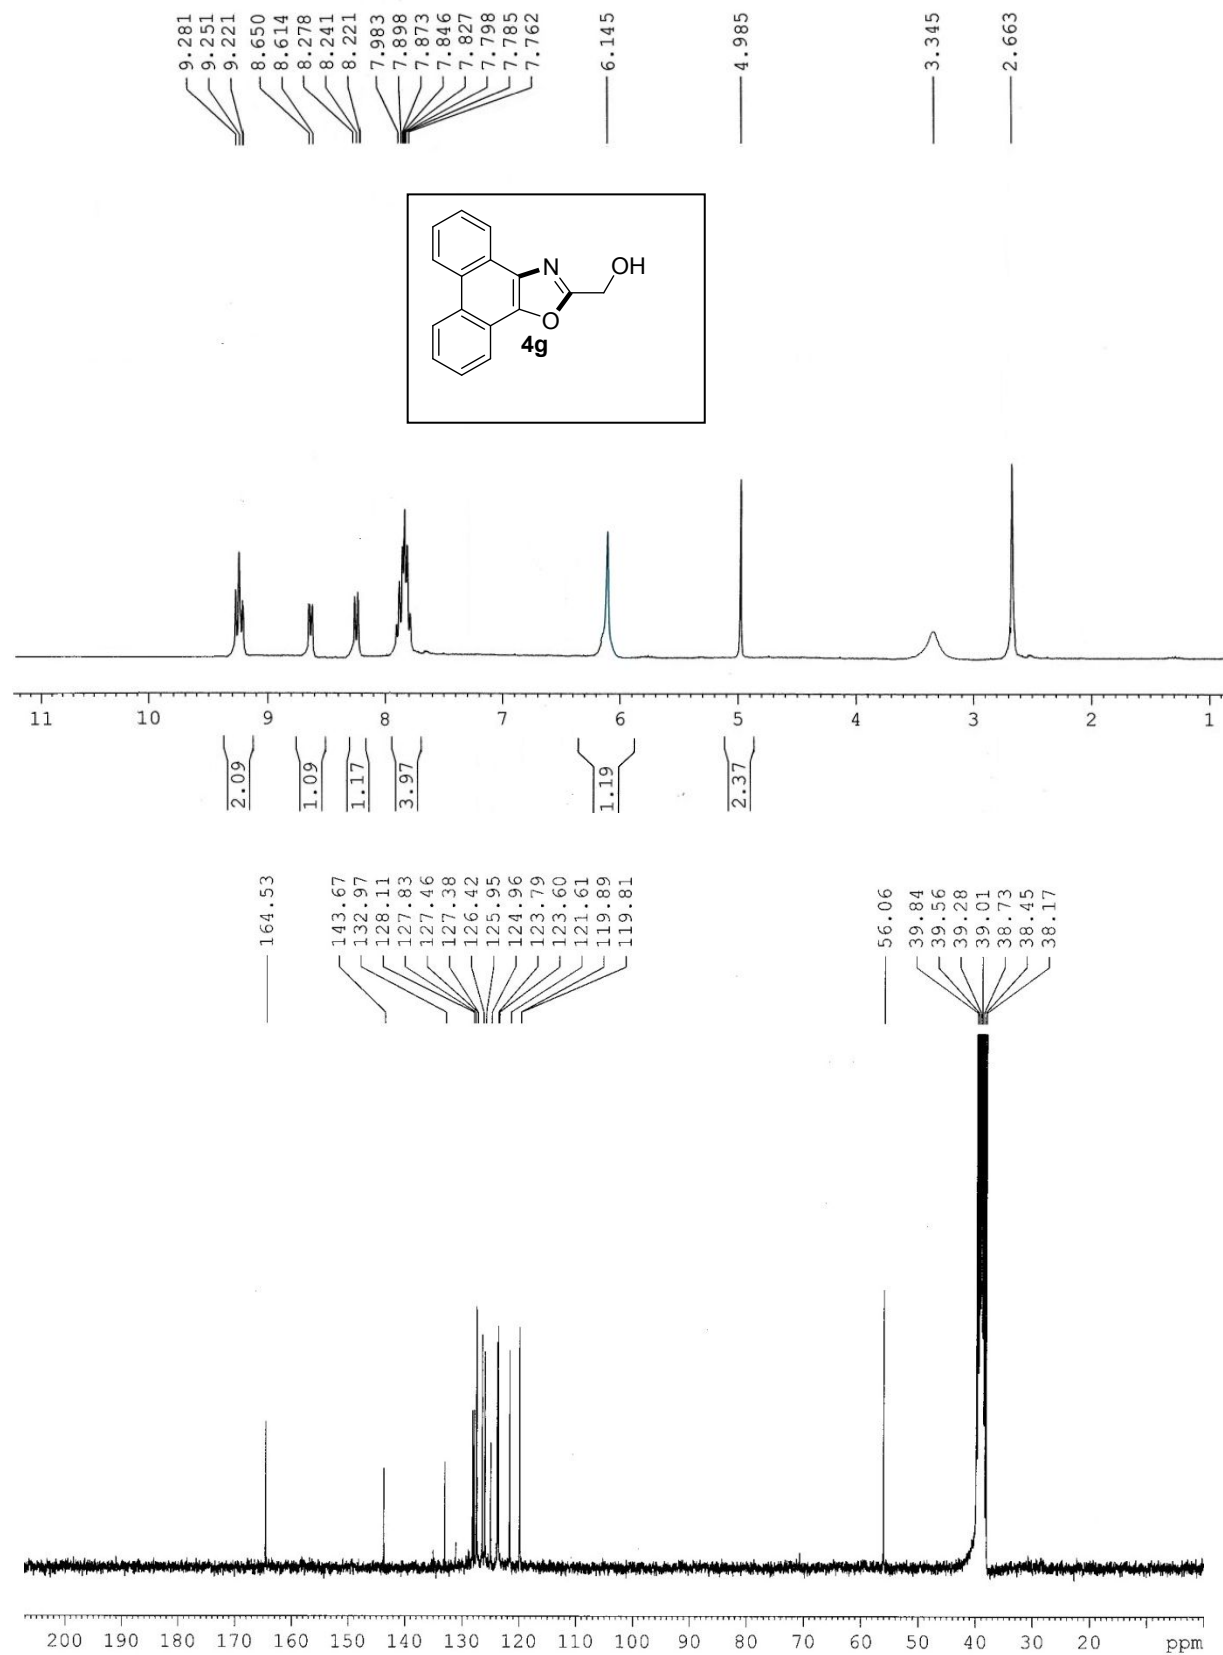



Figure S8.  $^1\text{H}$  and  $^{13}\text{C}$  NMR of 4h

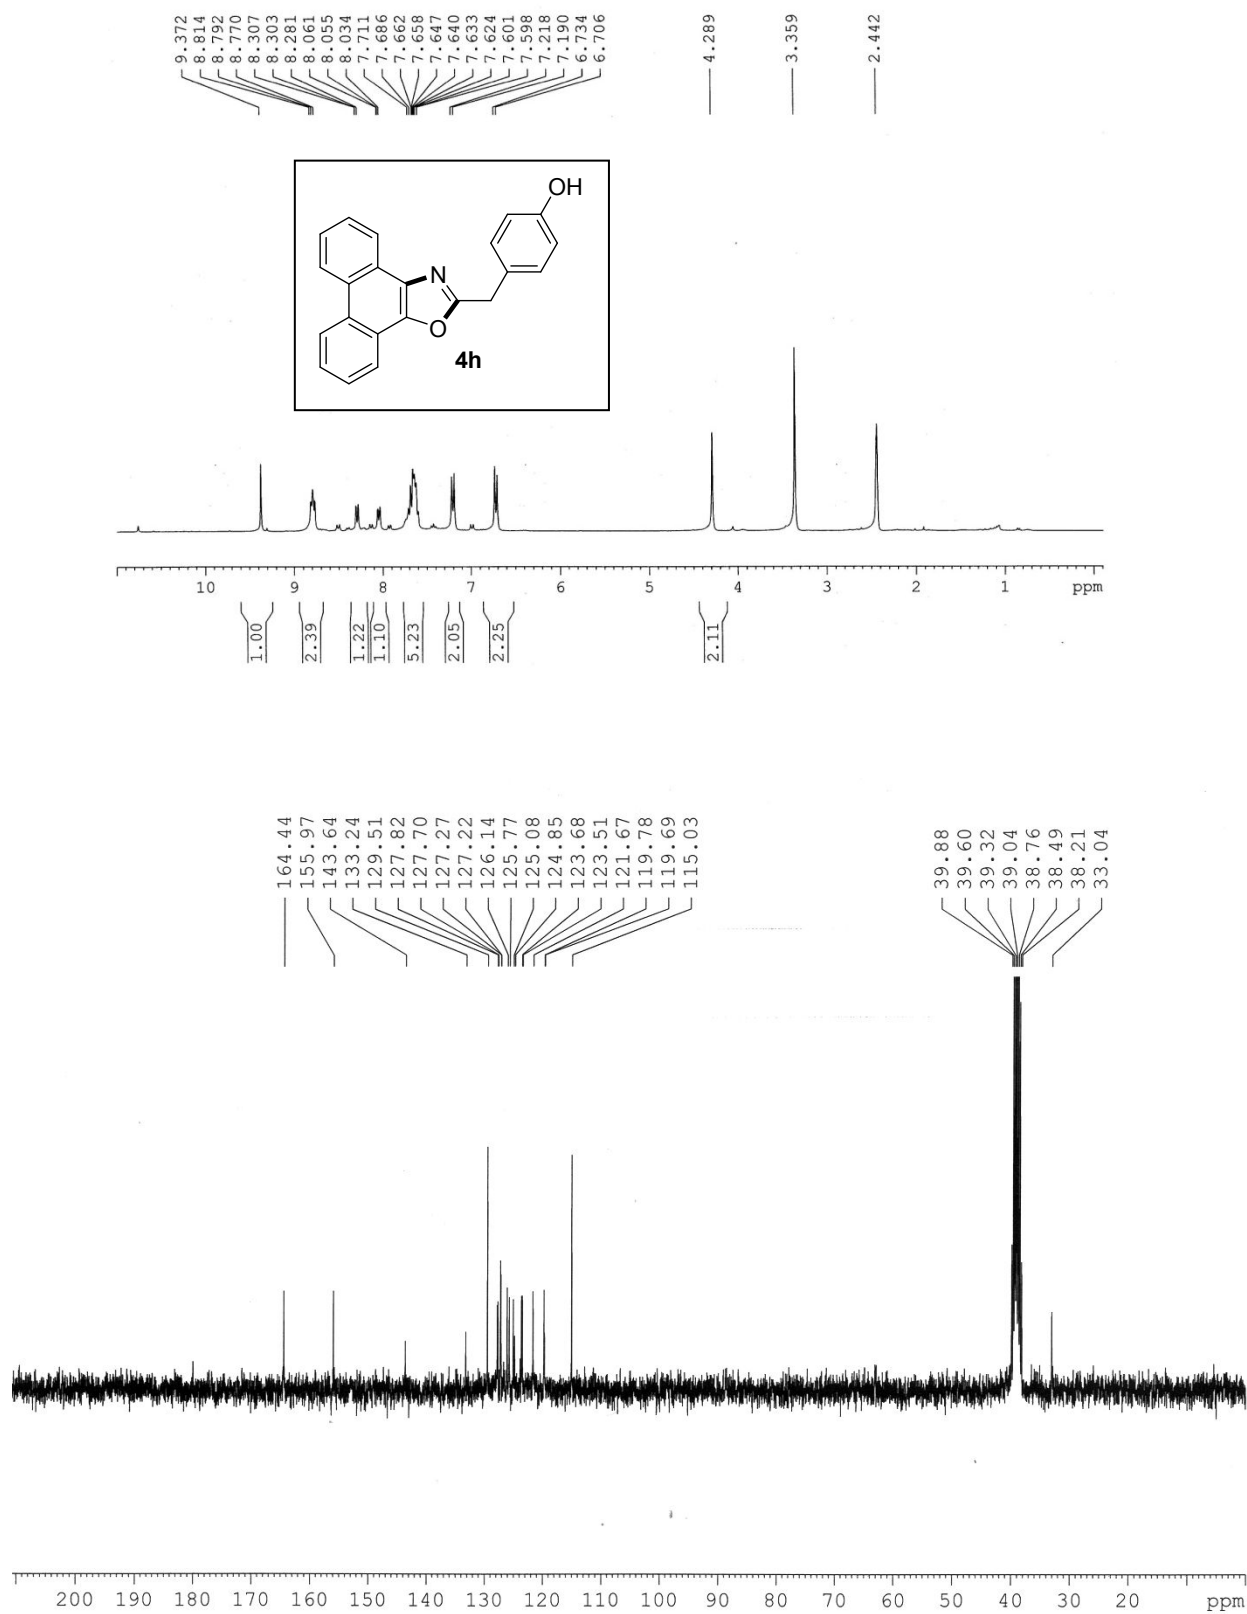

Figure S9. <sup>1</sup>H and <sup>13</sup>C NMR of 4i

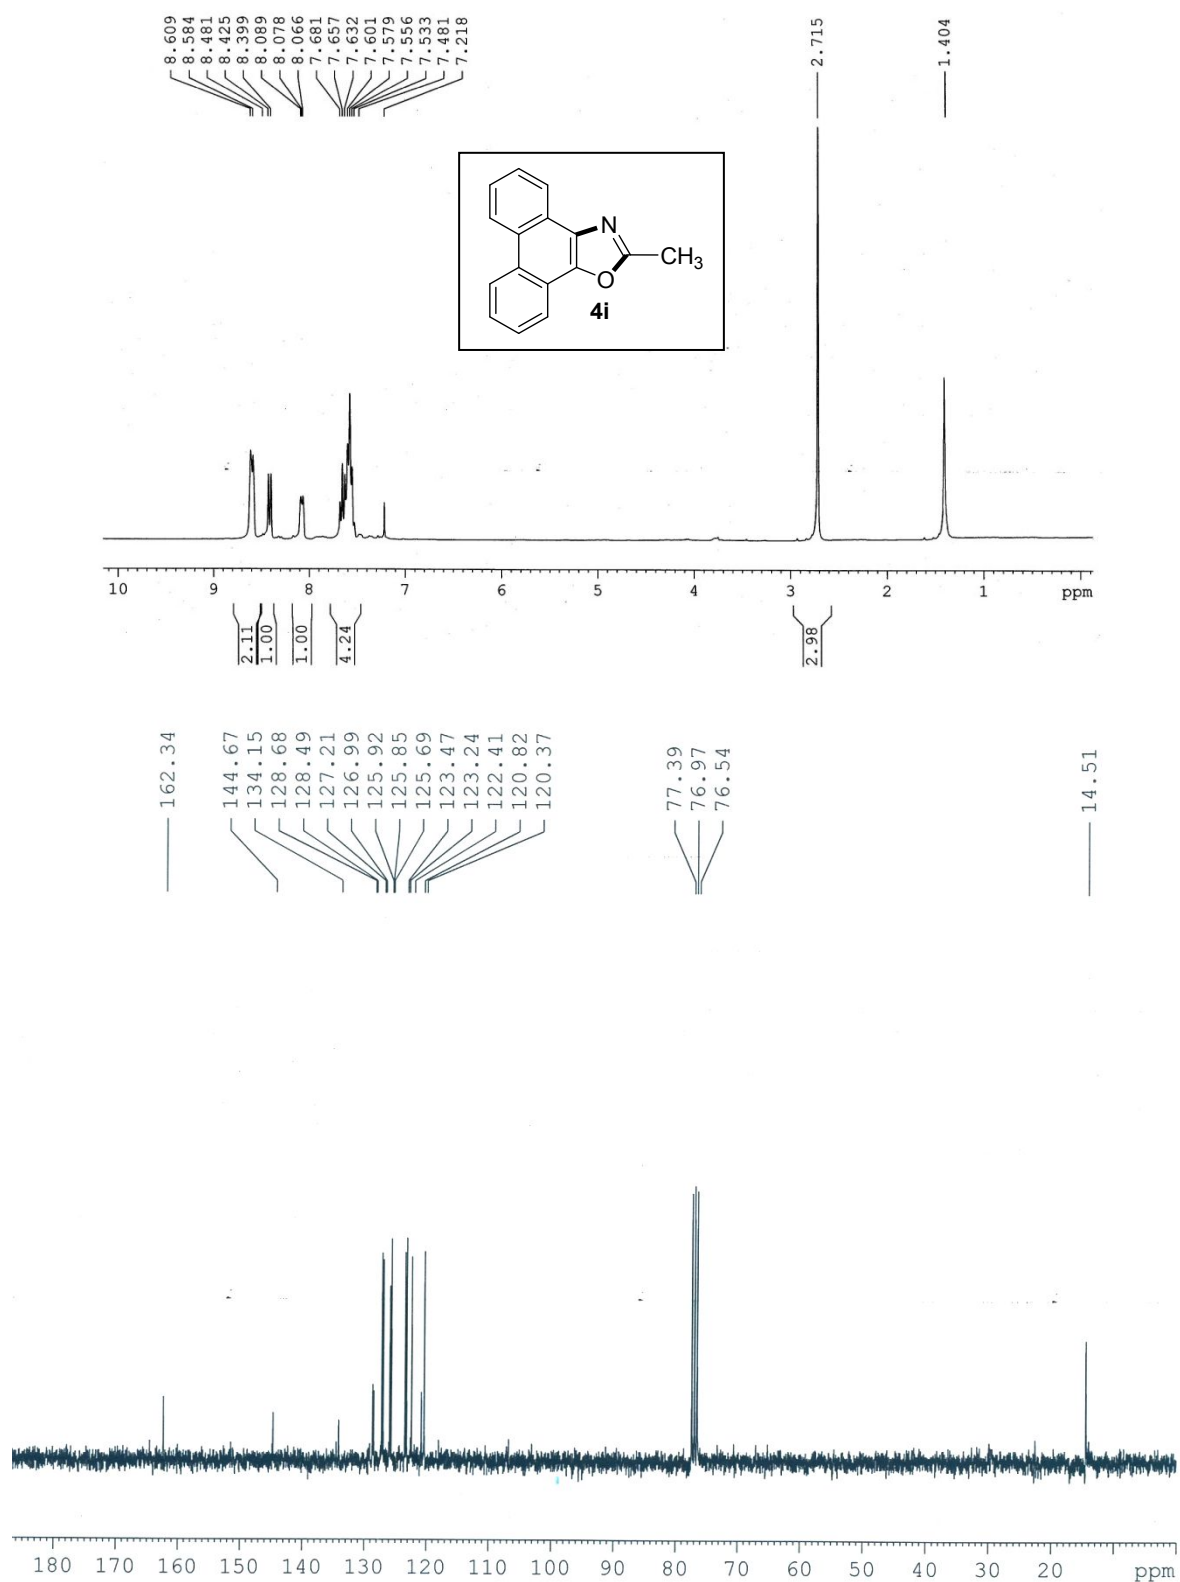

Figure S10. <sup>1</sup>H and <sup>13</sup>C NMR of 4j

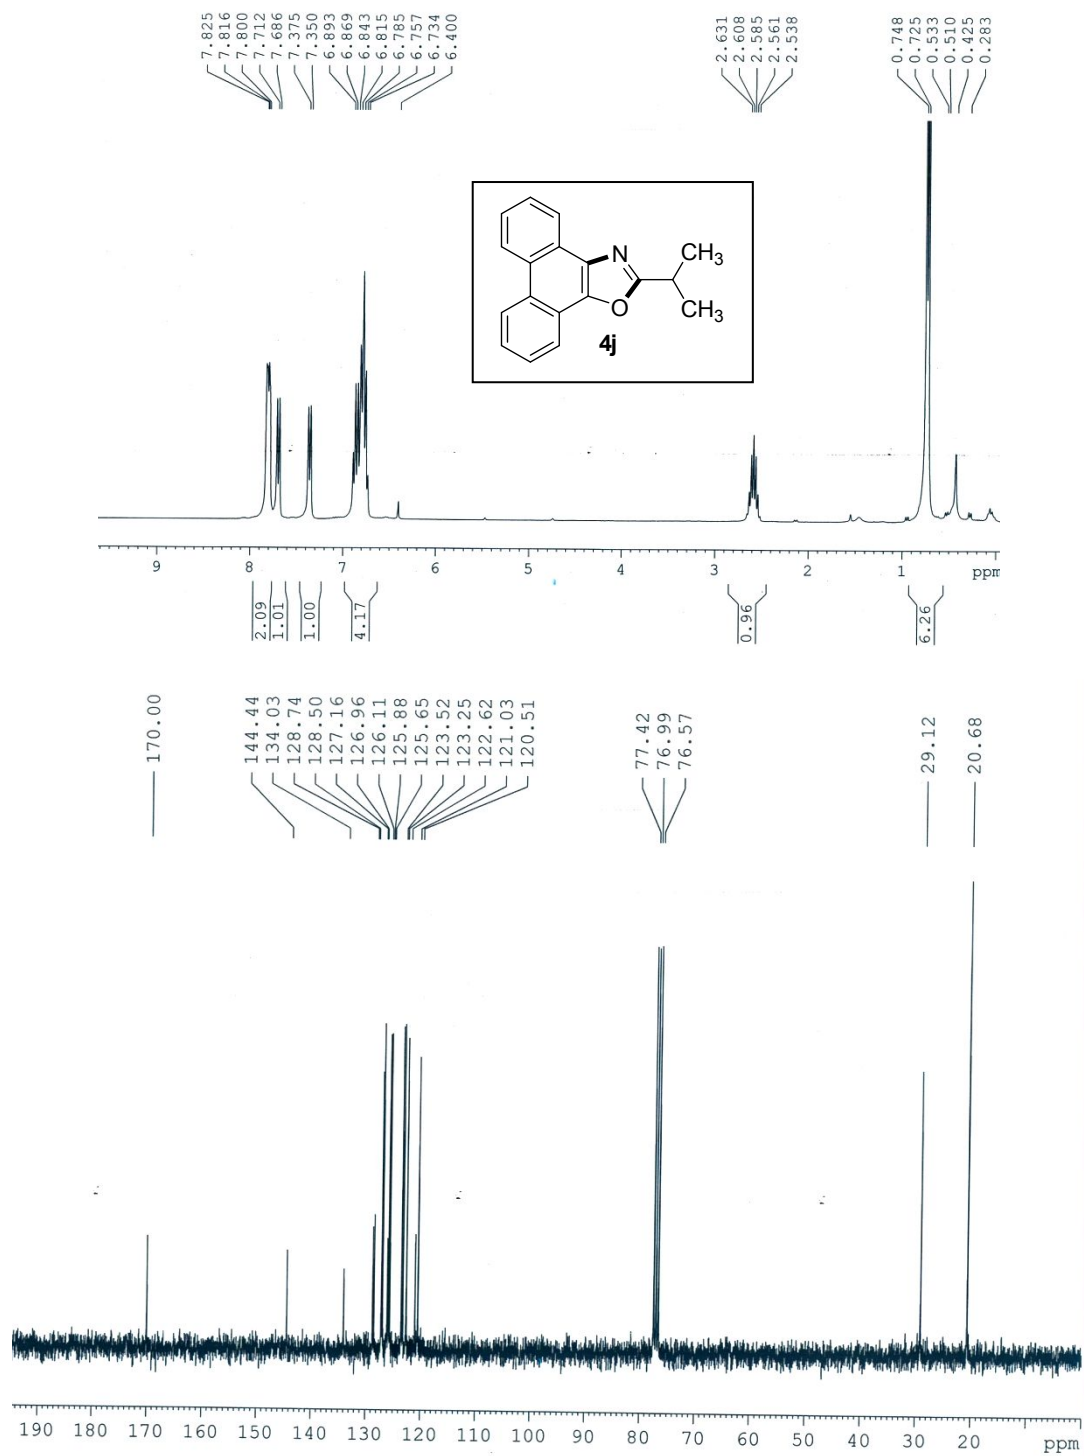

Figure S11. <sup>1</sup>H and <sup>13</sup>C NMR of 4k

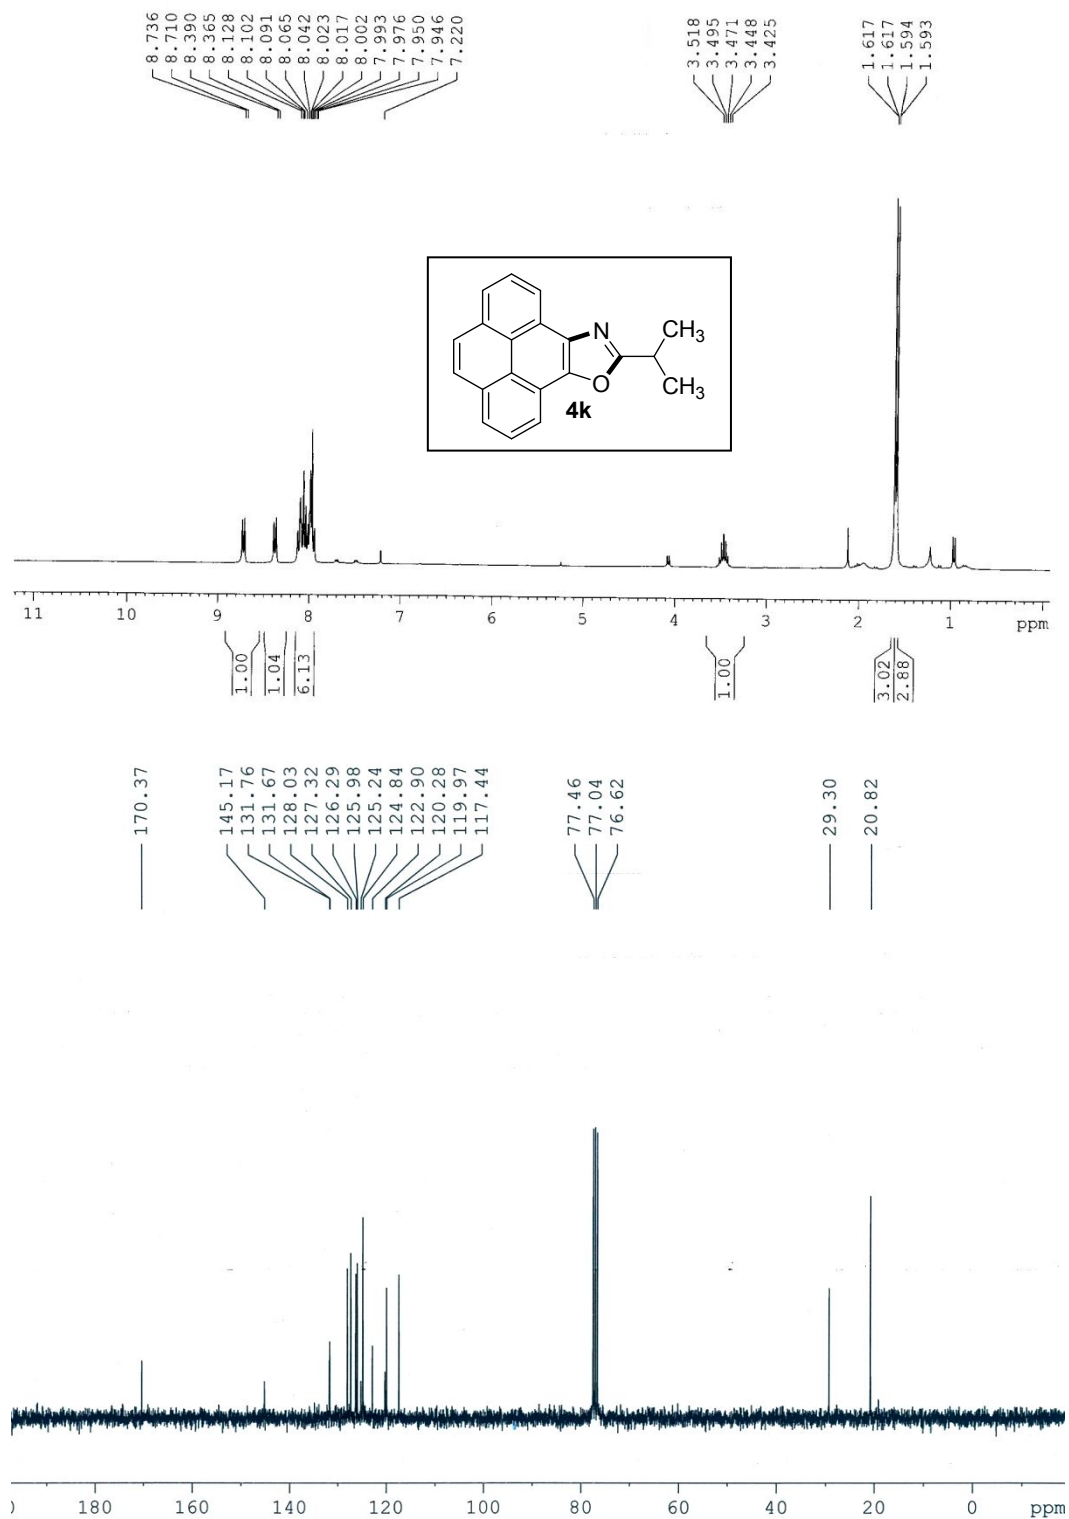

Figure S12.  $^1\text{H}$  and  $^{13}\text{C}$  NMR of 4I

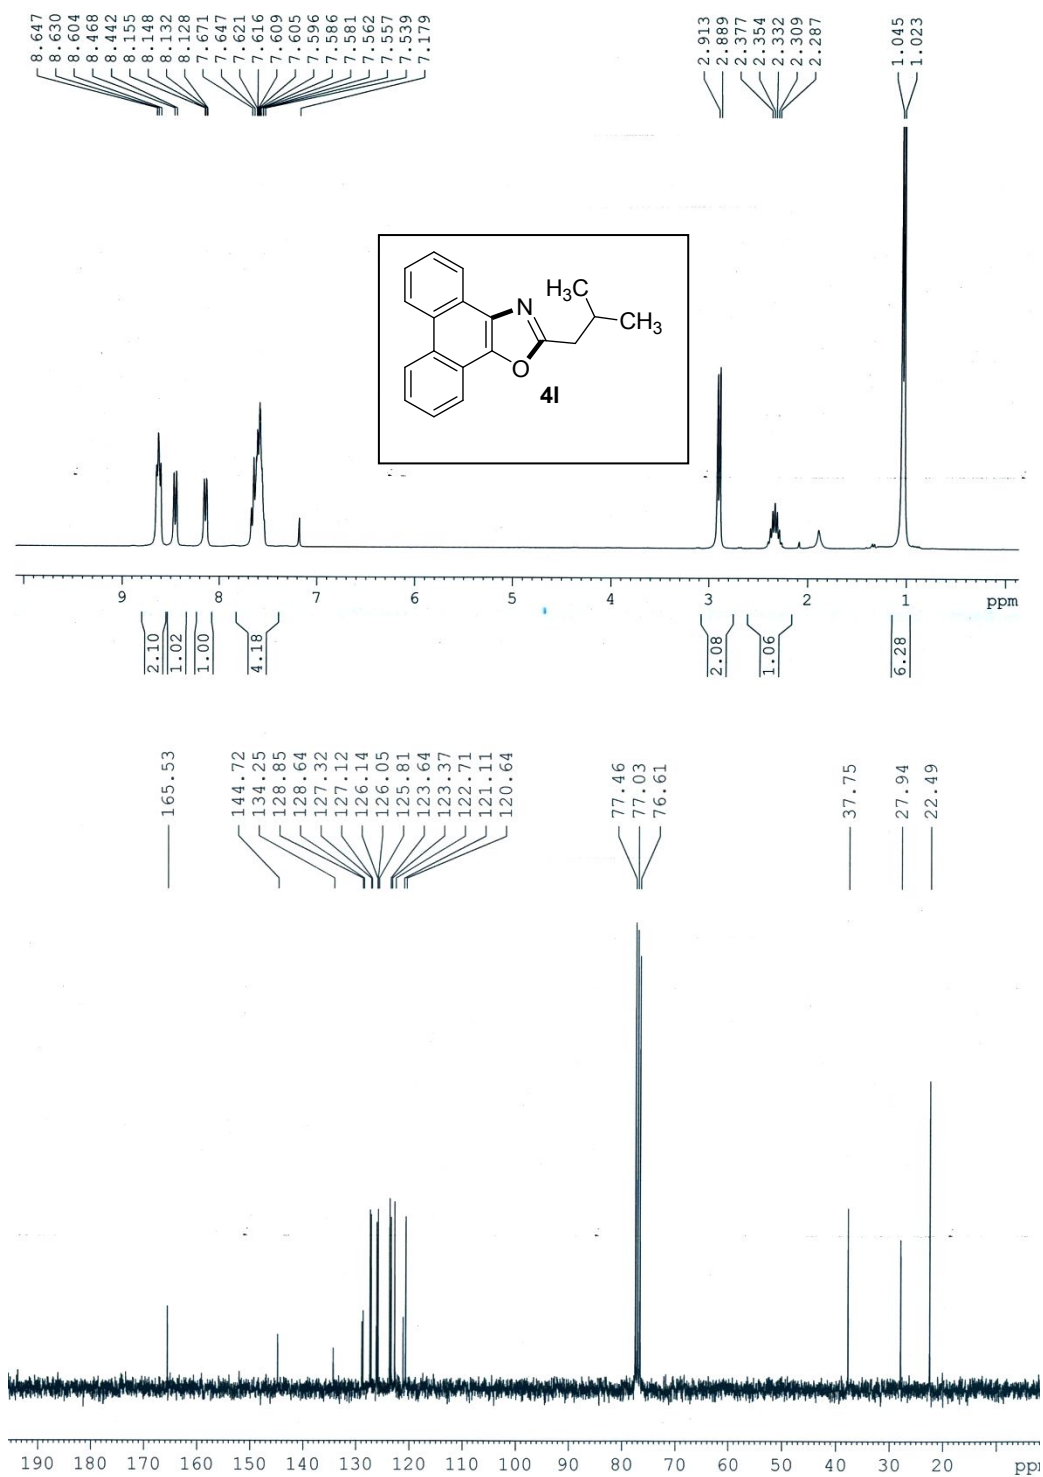

Figure S13. <sup>1</sup>H and <sup>13</sup>C NMR of 4m

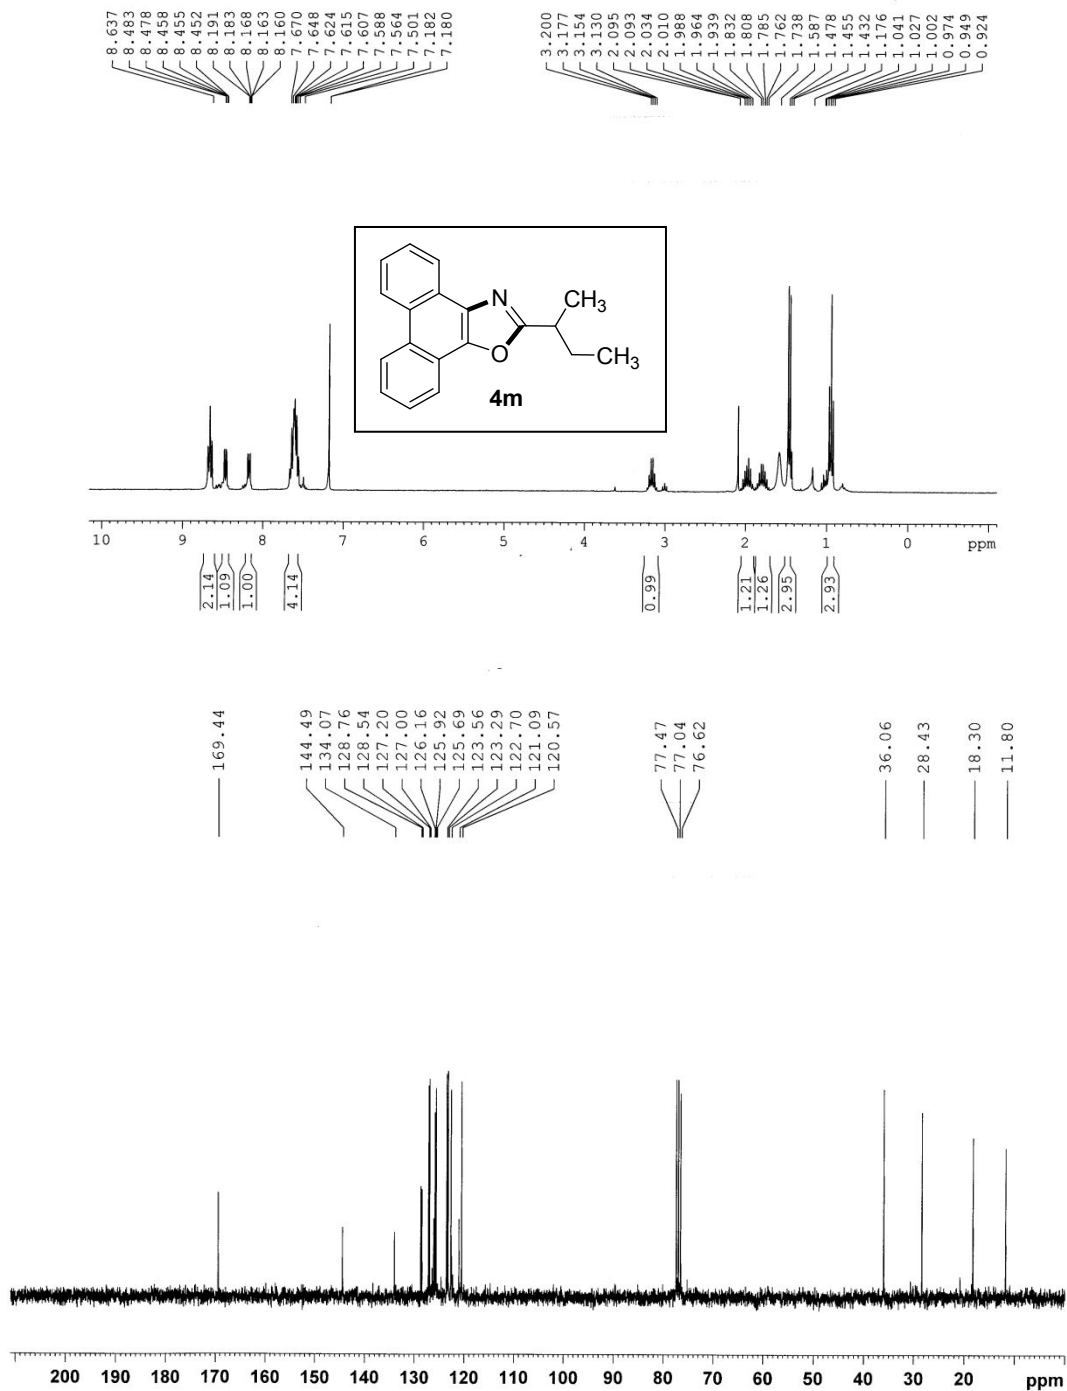

Figure S14.  $^1\text{H}$  and  $^{13}\text{C}$  NMR of **4n**

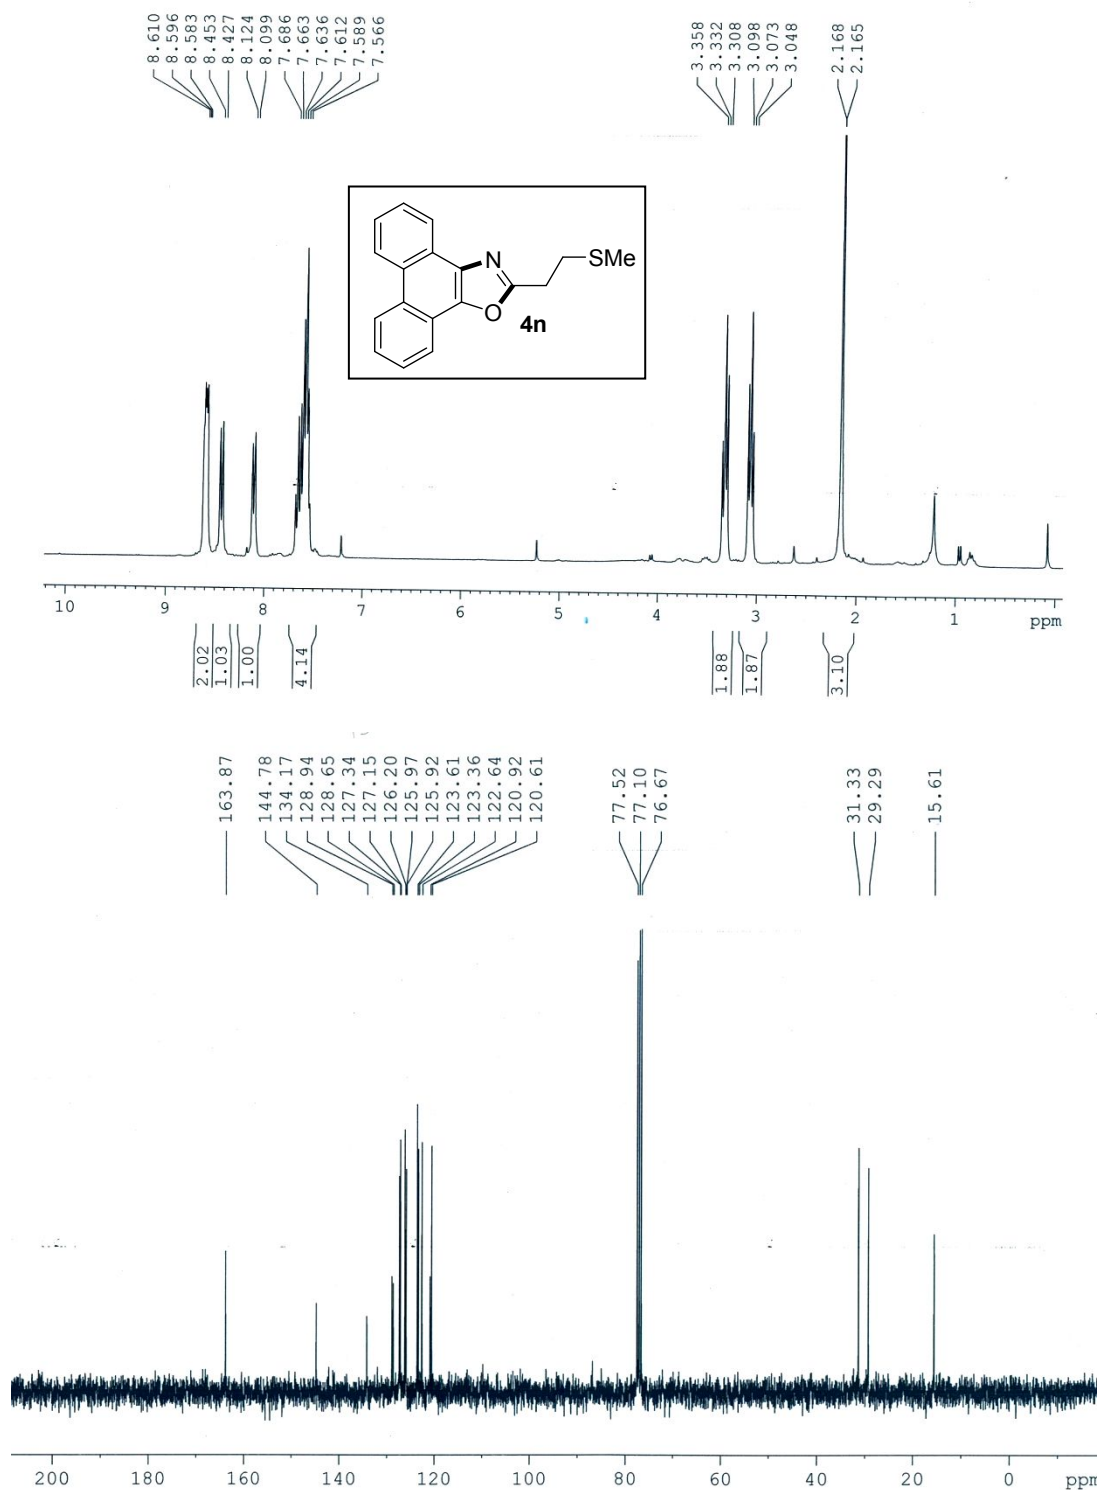

Figure S15. <sup>1</sup>H and <sup>13</sup>C NMR of 4o

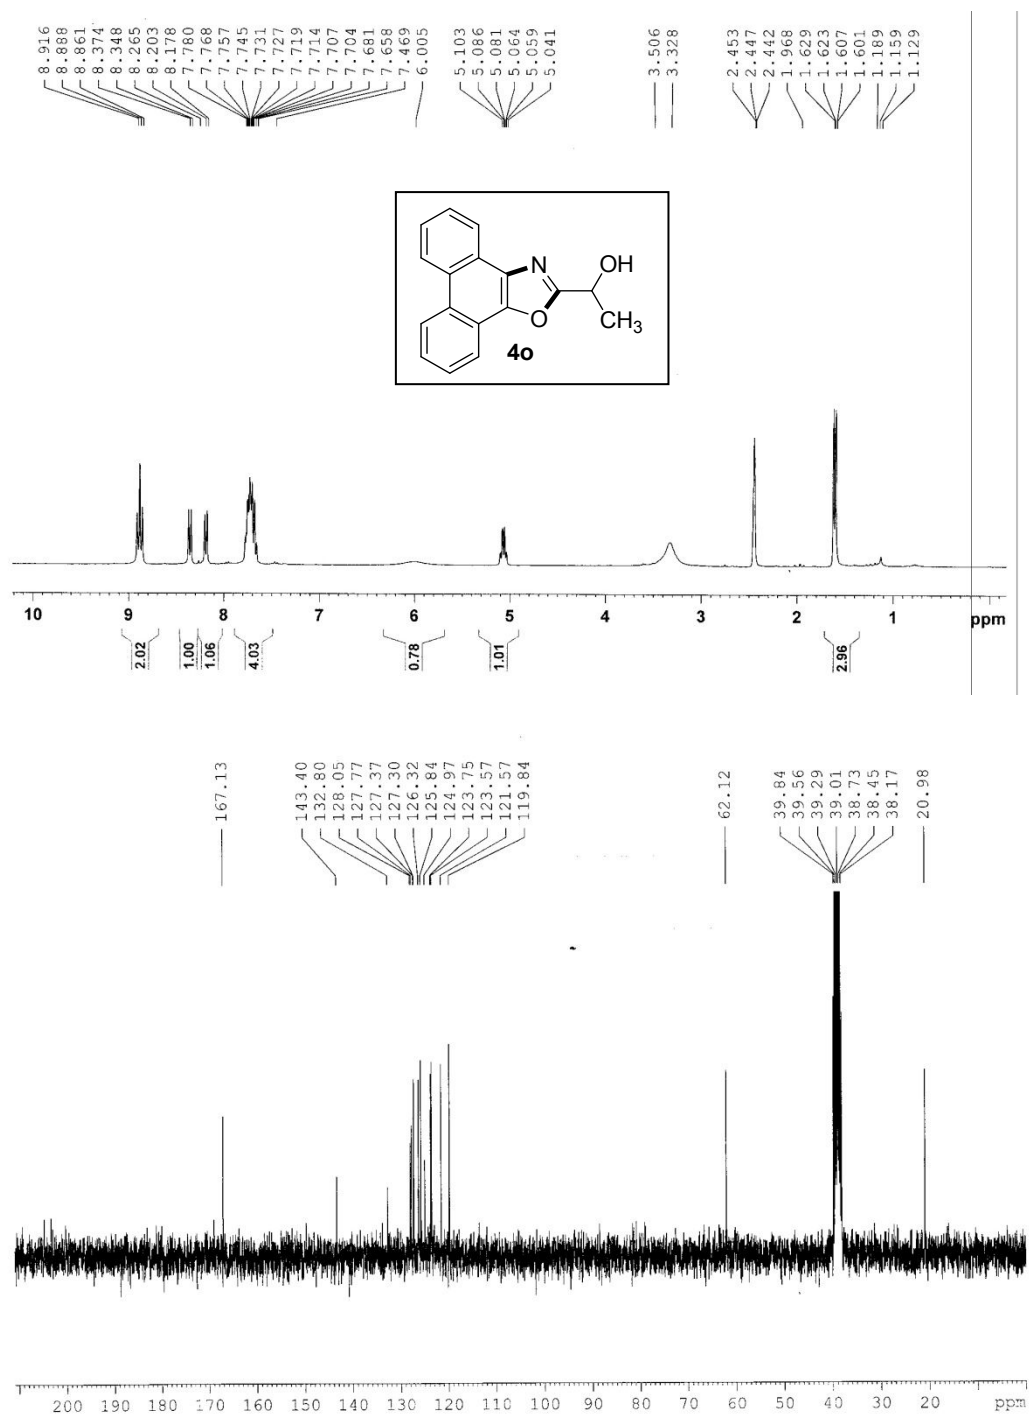



Figure S16.  $^1\text{H}$  and  $^{13}\text{C}$  NMR of 4p

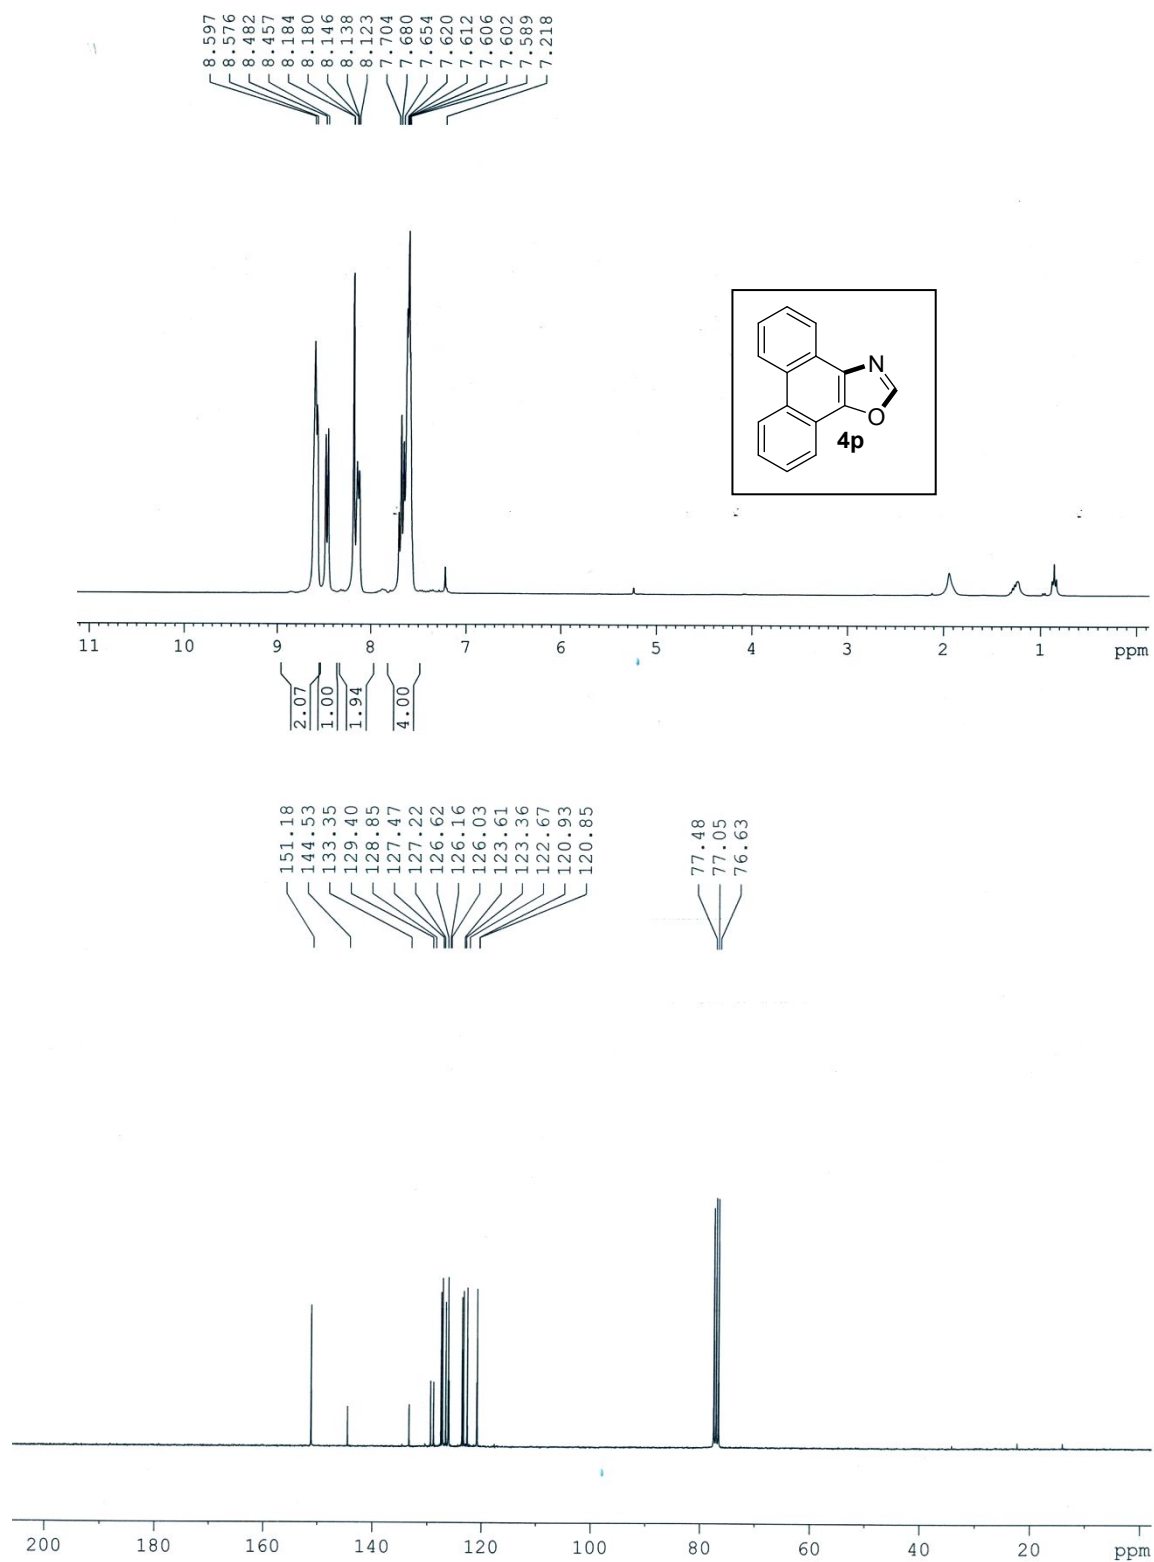

Figure S17.  $^1\text{H}$  and  $^{13}\text{C}$  NMR of 4r

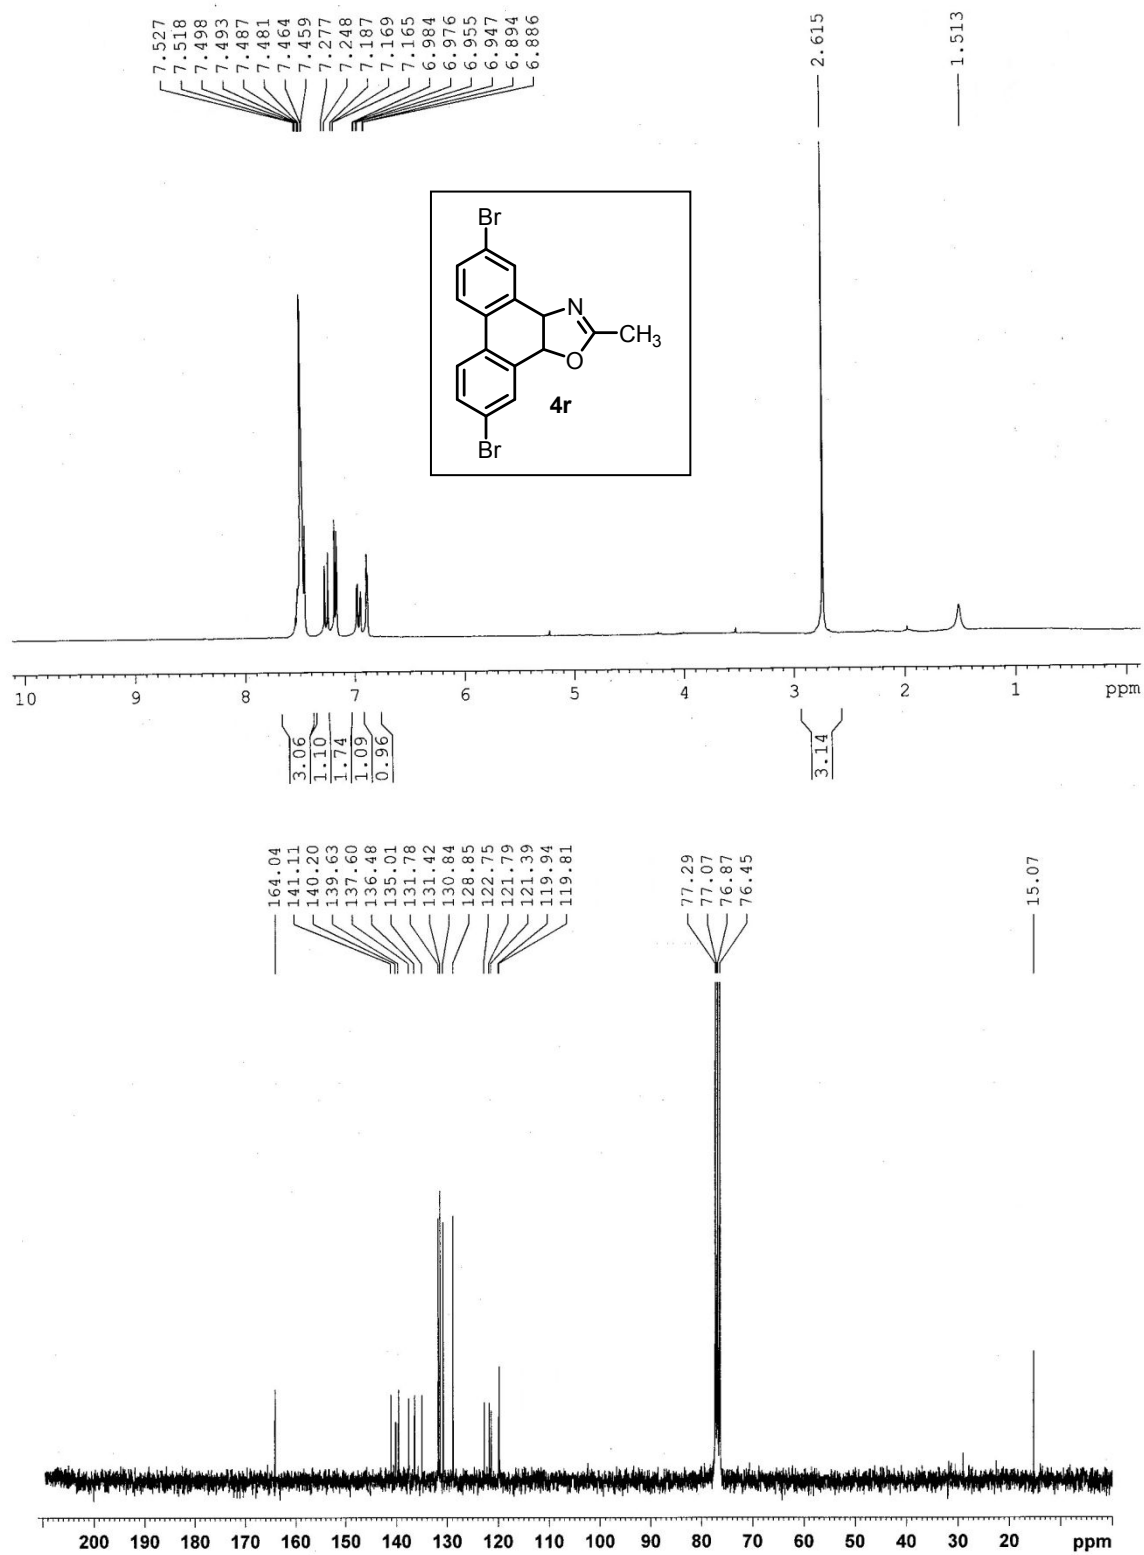

Figure S18.  $^1\text{H}$  and  $^{13}\text{C}$  NMR of 4s

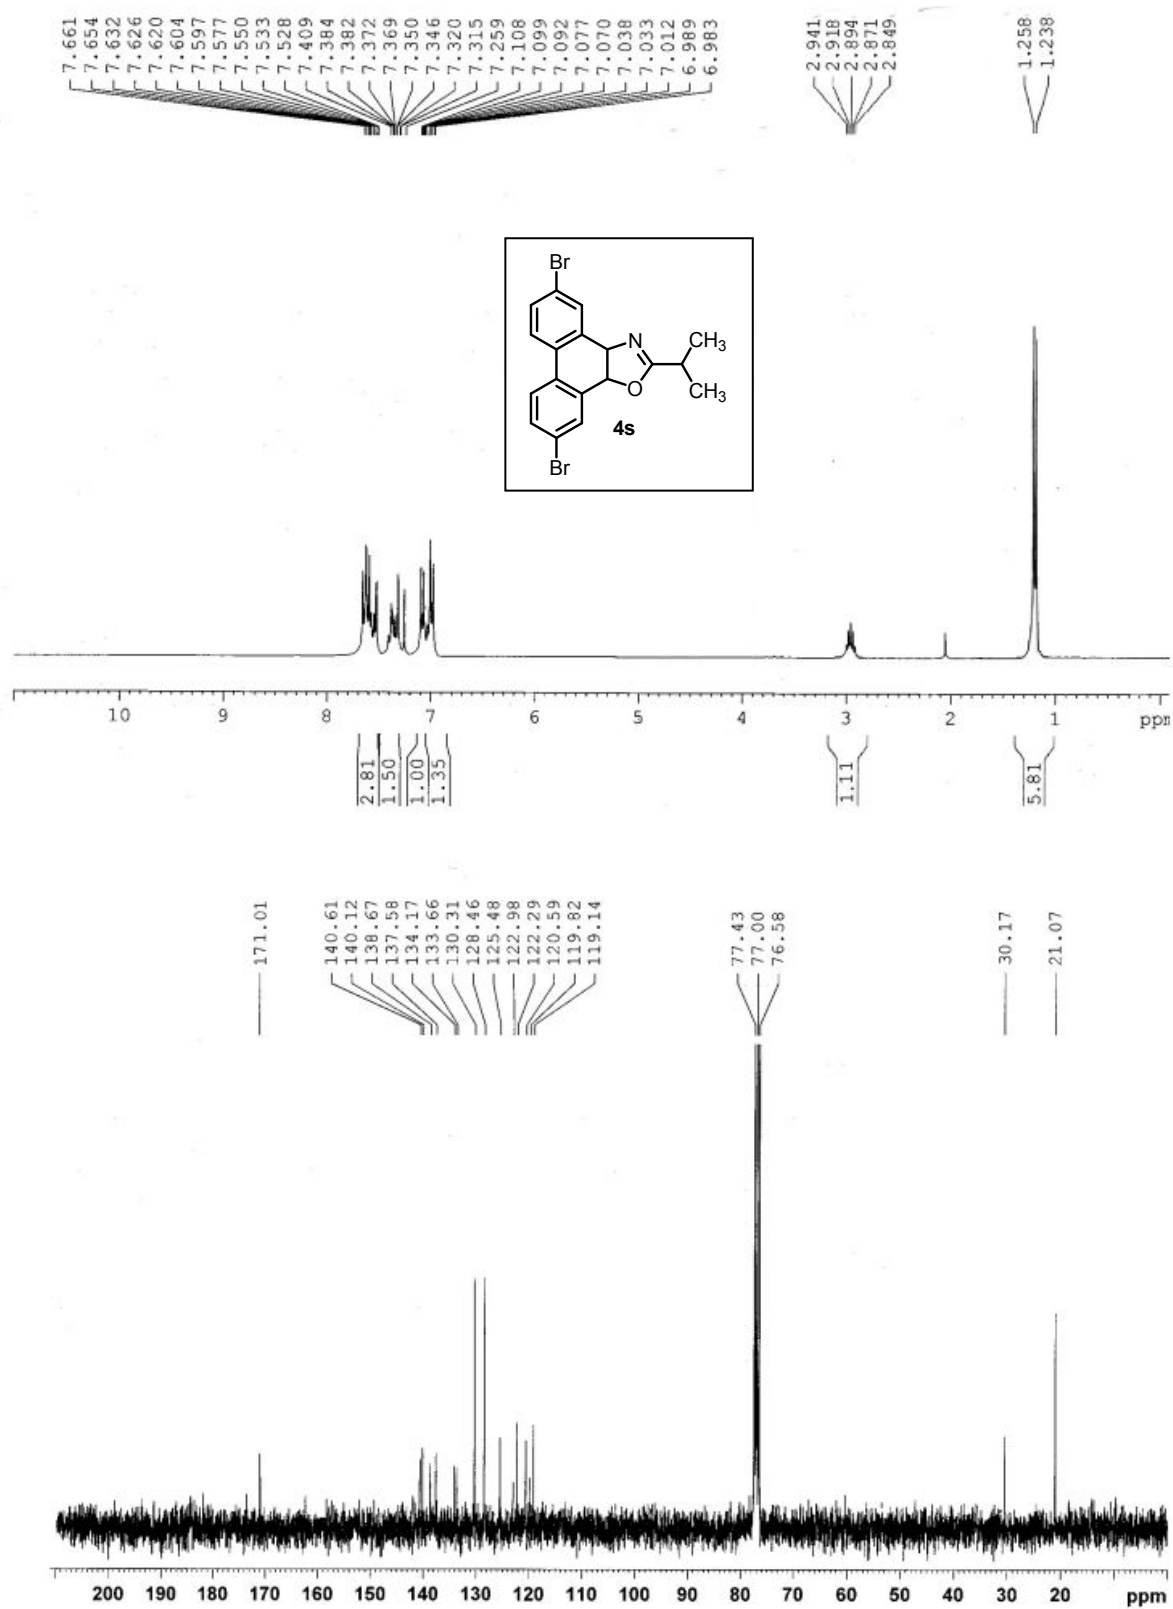

Figure S19.  $^1\text{H}$  and  $^{13}\text{C}$  NMR of **6a**

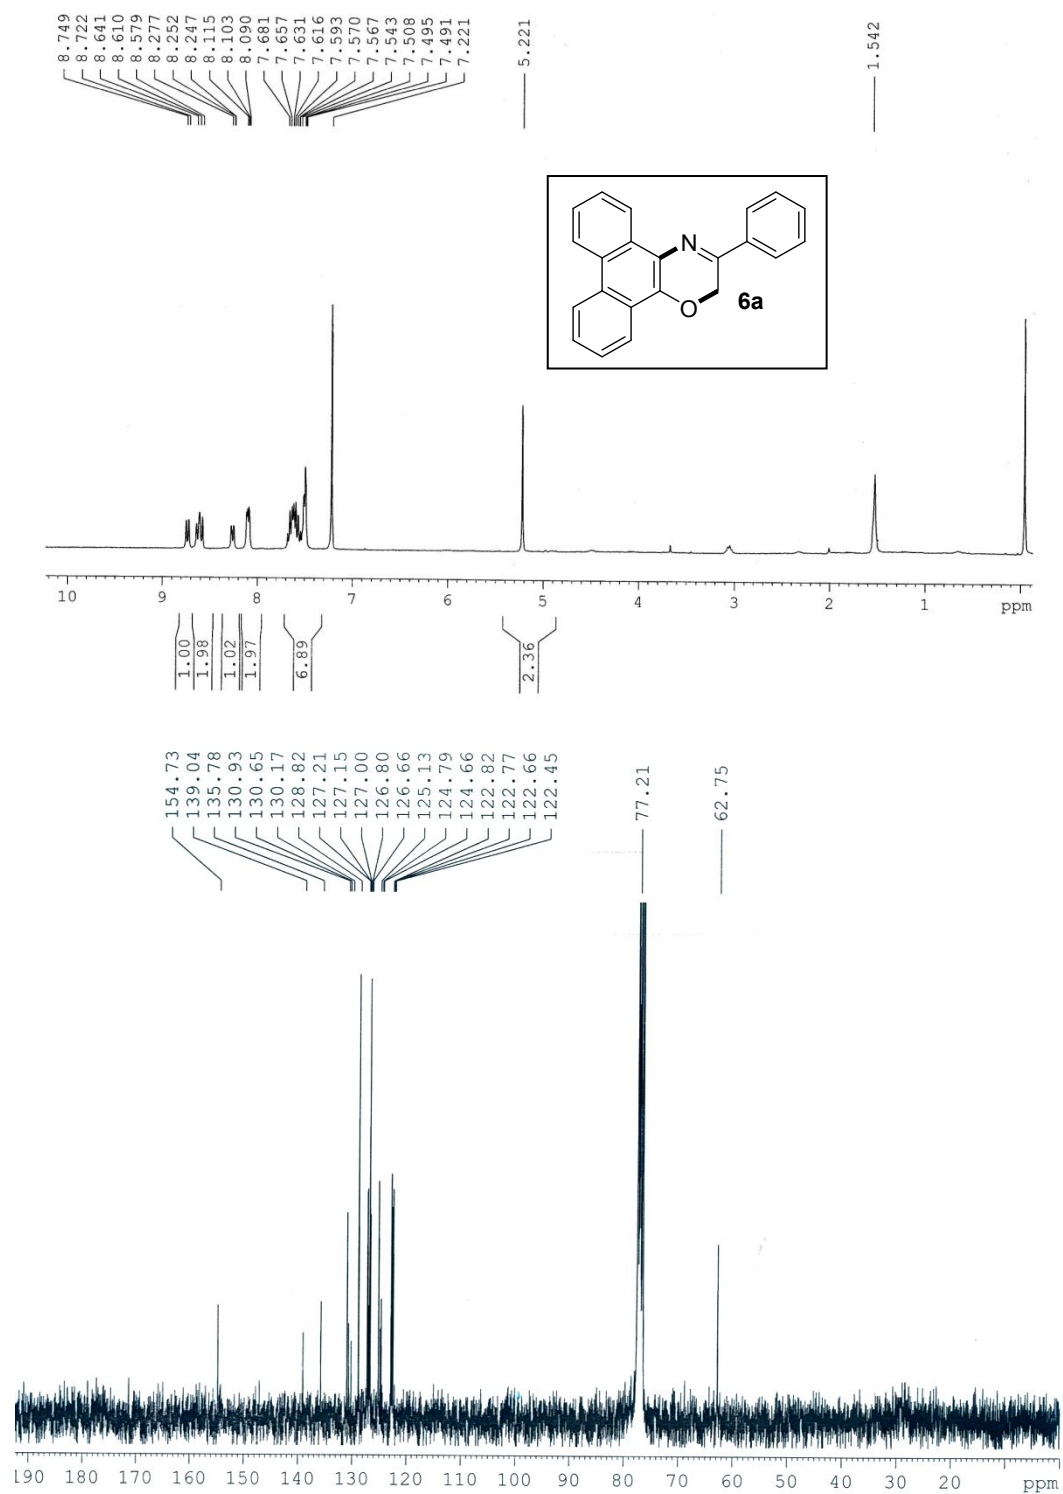

Figure S20.  $^1\text{H}$  and  $^{13}\text{C}$  NMR of **6b**

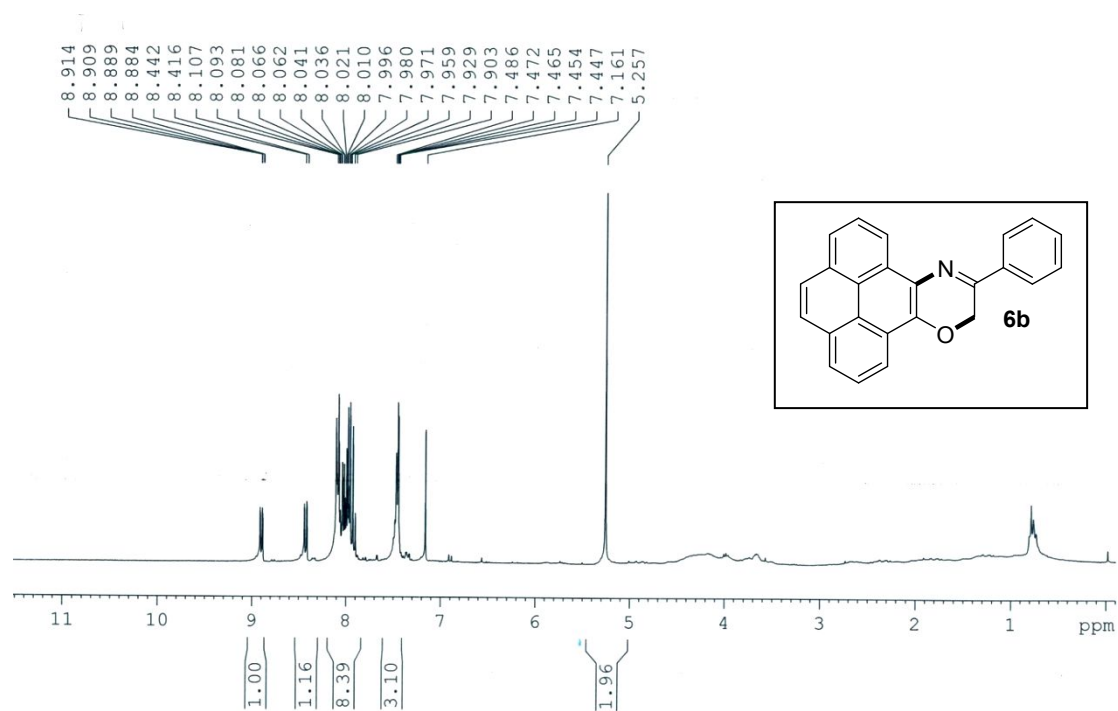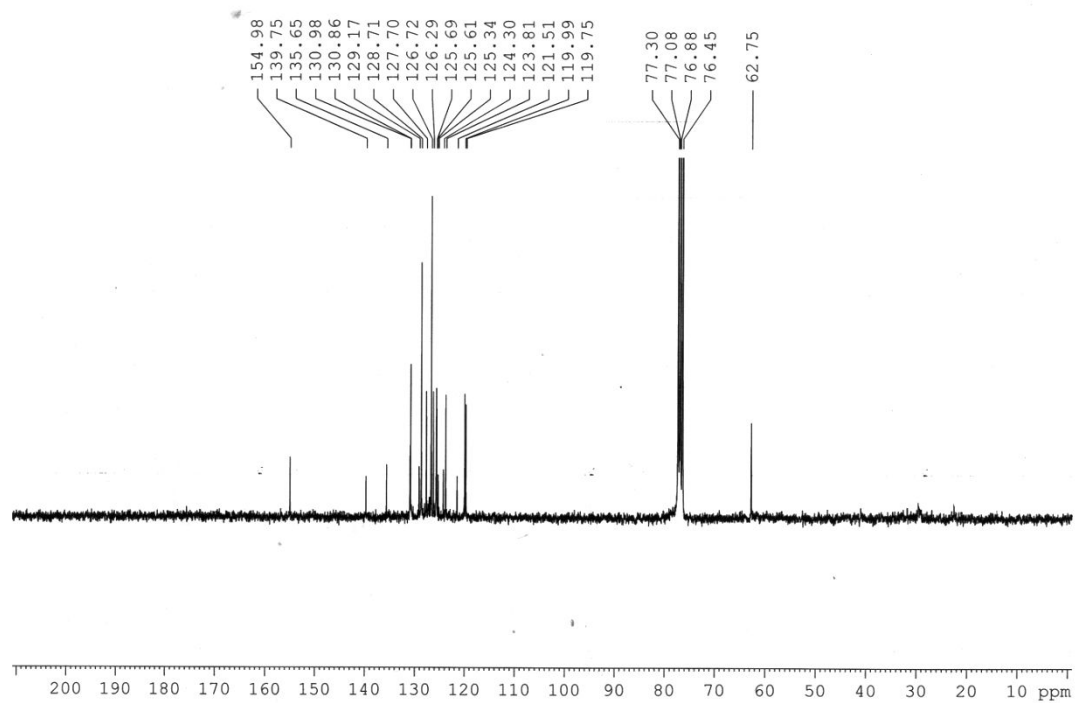

Figure S21. <sup>1</sup>H and <sup>13</sup>C NMR of 6c

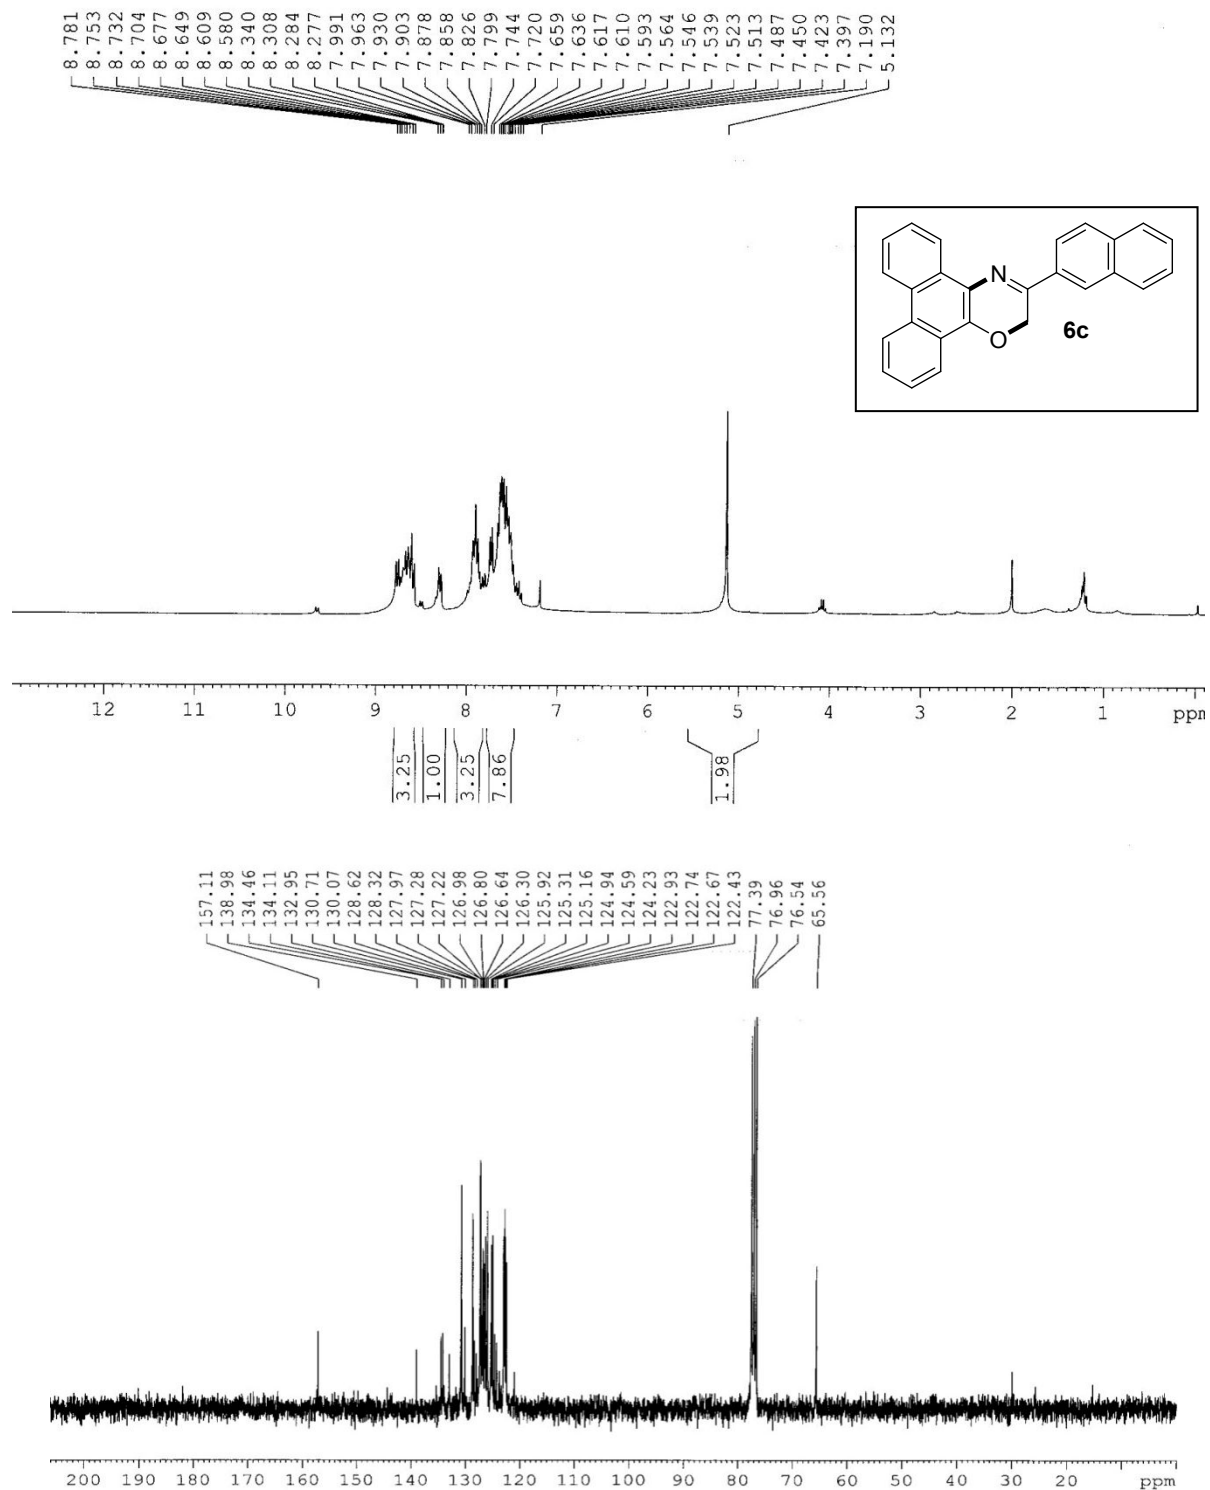

Figure S22.  $^1\text{H}$  and  $^{13}\text{C}$  NMR of 6d

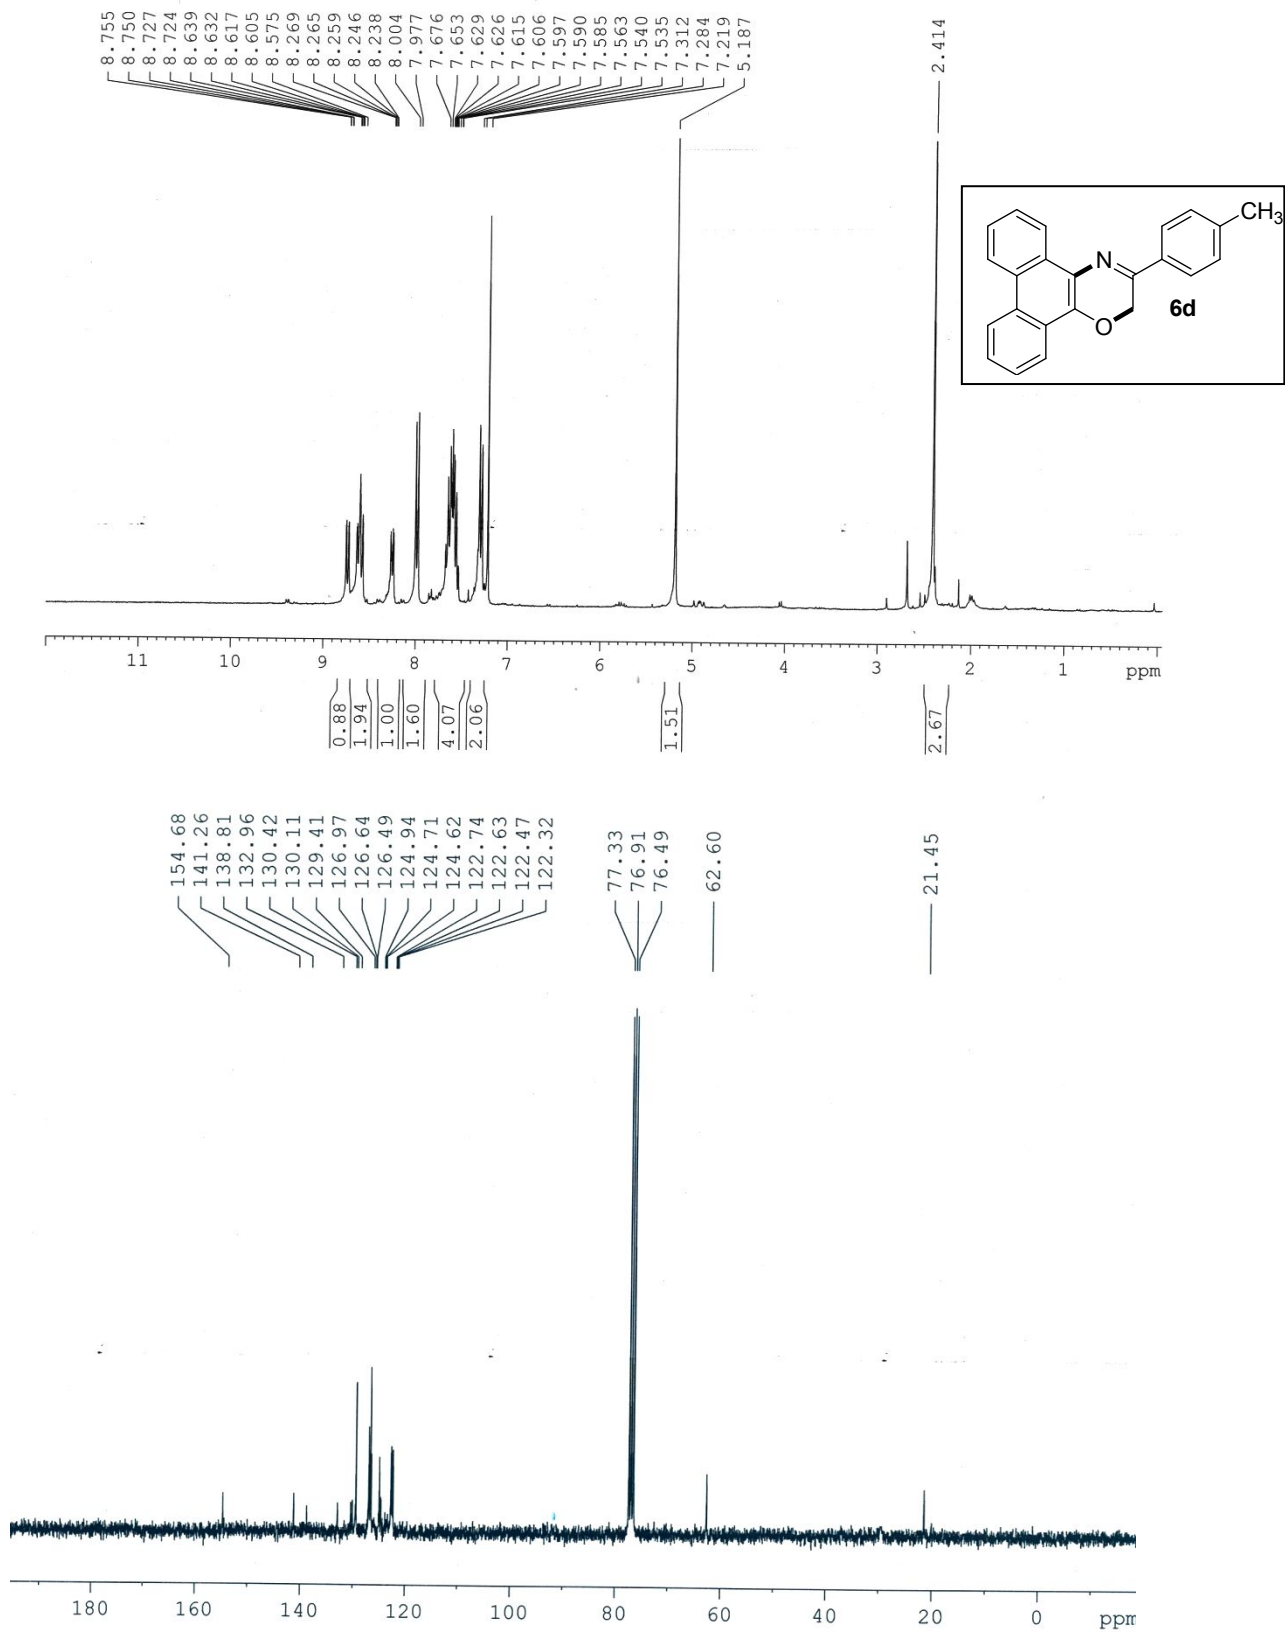

Figure S23.  $^1\text{H}$  and  $^{13}\text{C}$  NMR of **6e**

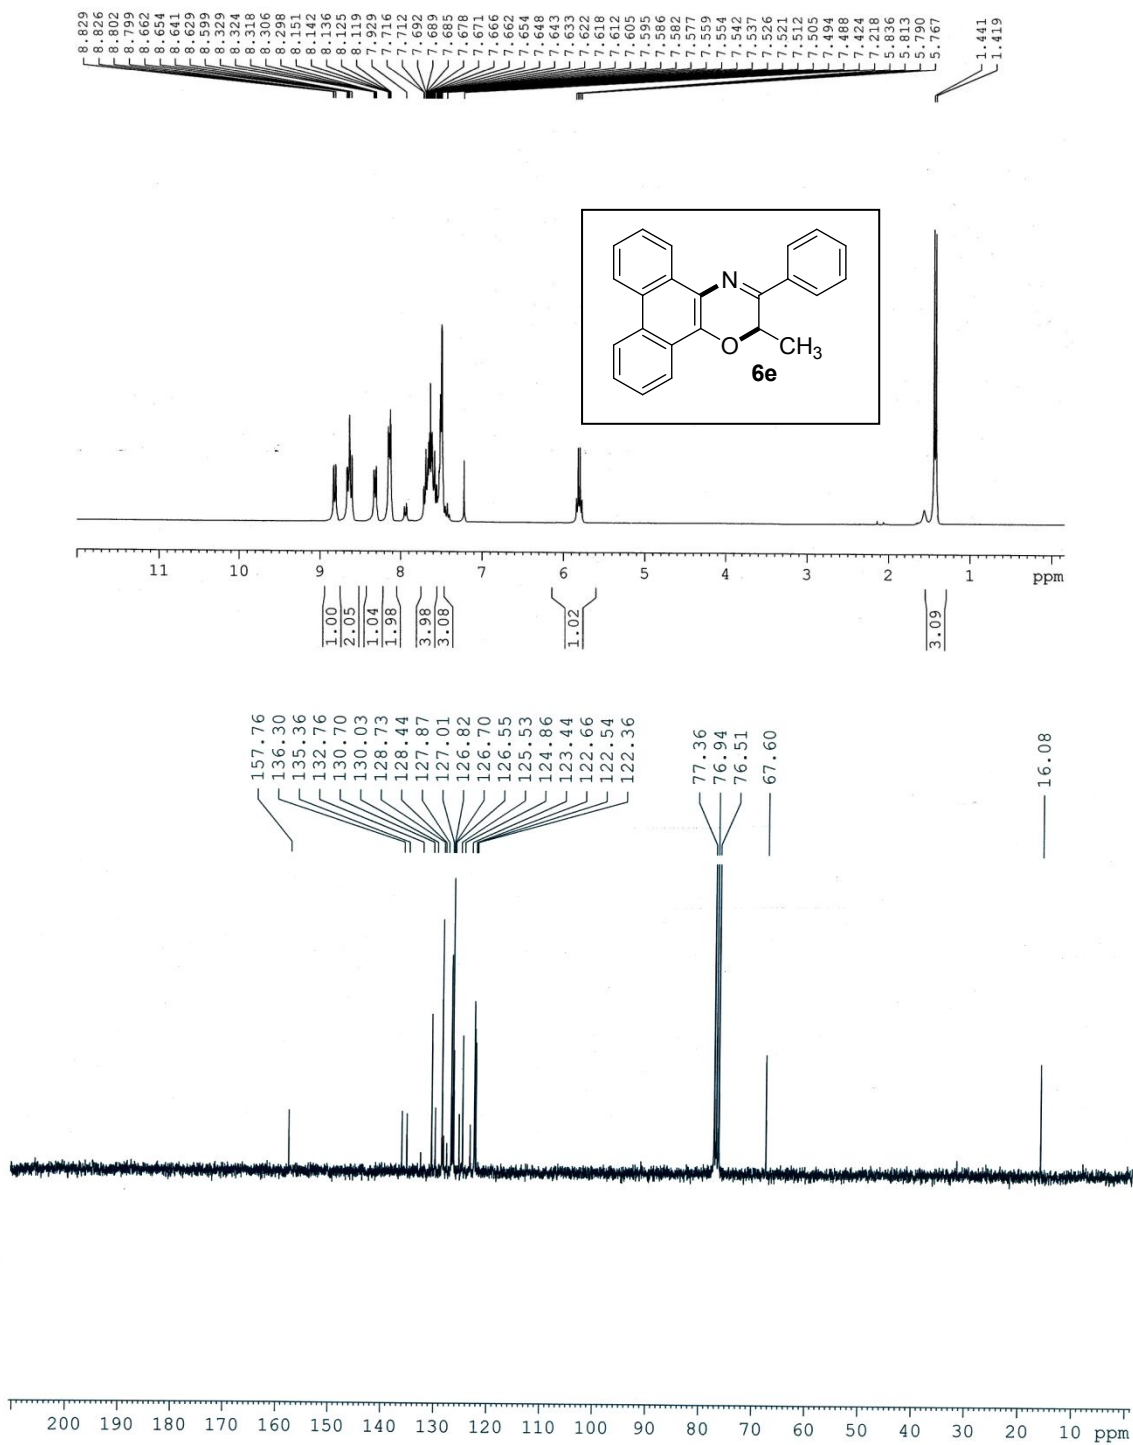



Figure S24.  $^1\text{H}$  and  $^{13}\text{C}$  NMR of **6f**

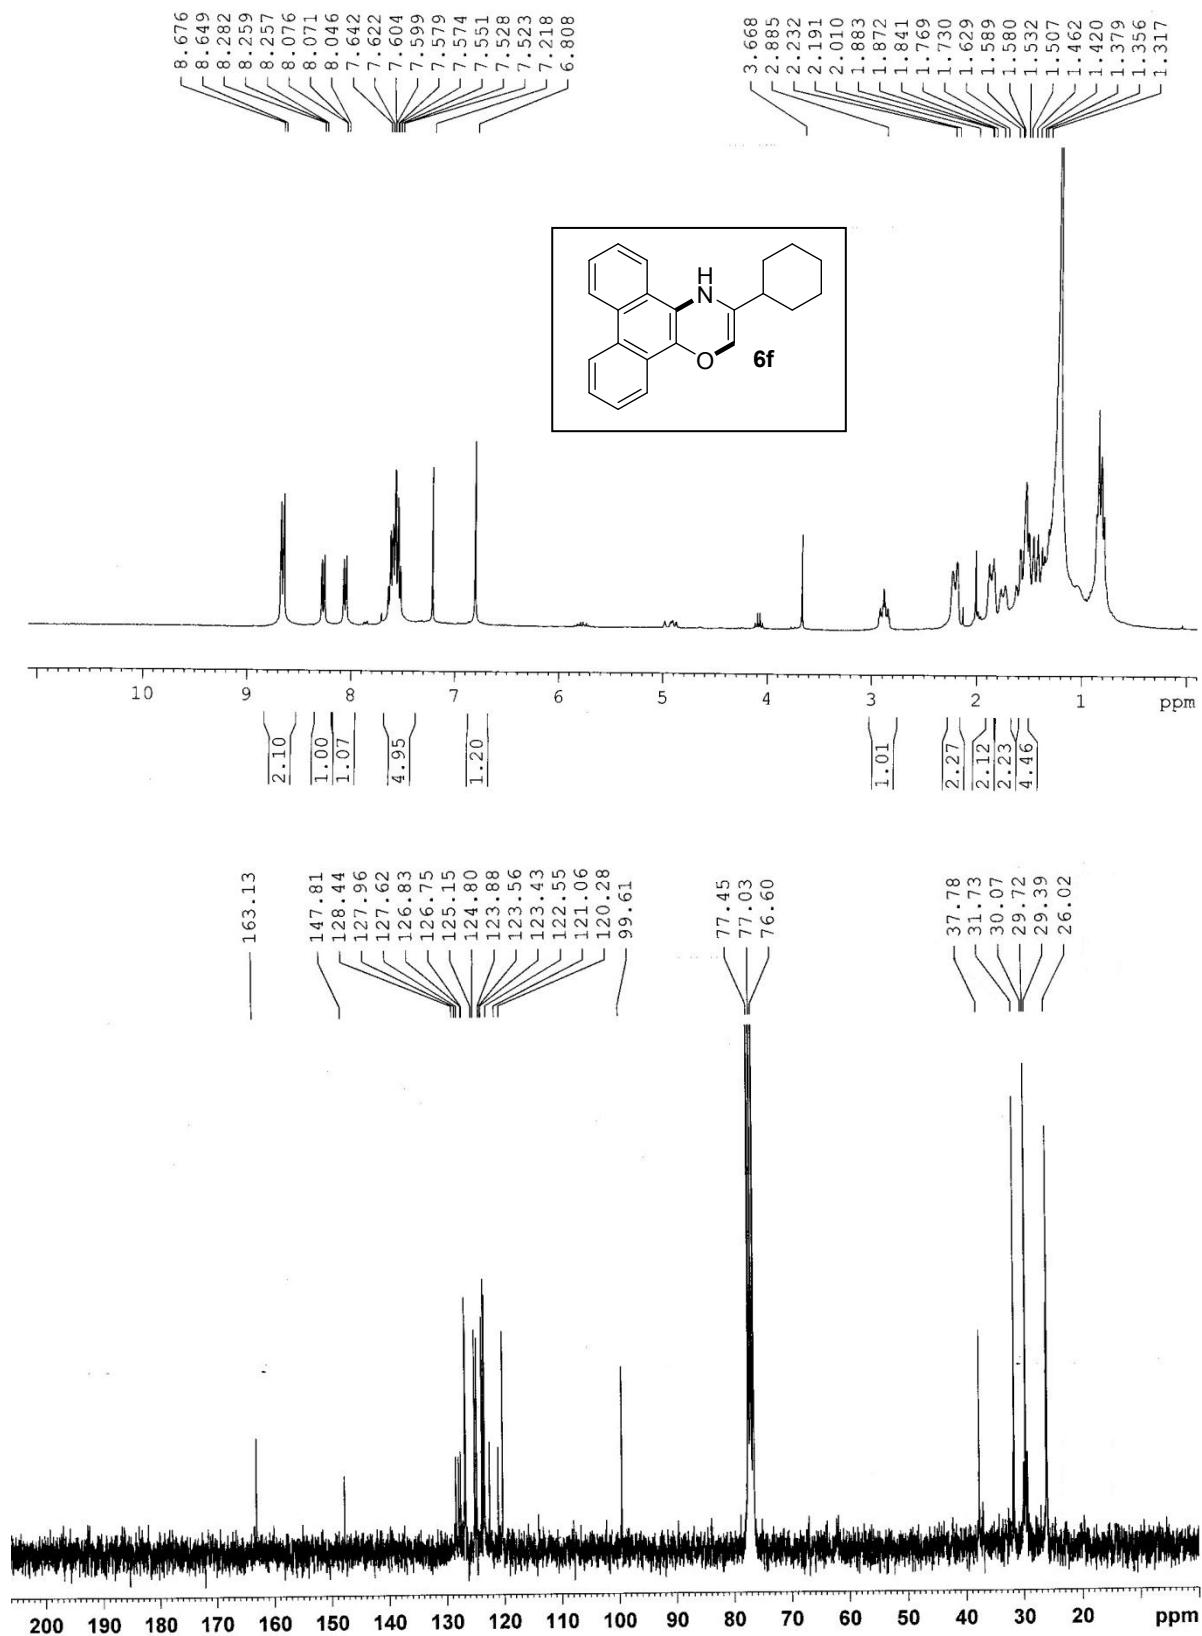

Figure S25.  $^1\text{H}$  and  $^{13}\text{C}$  NMR of **6g**

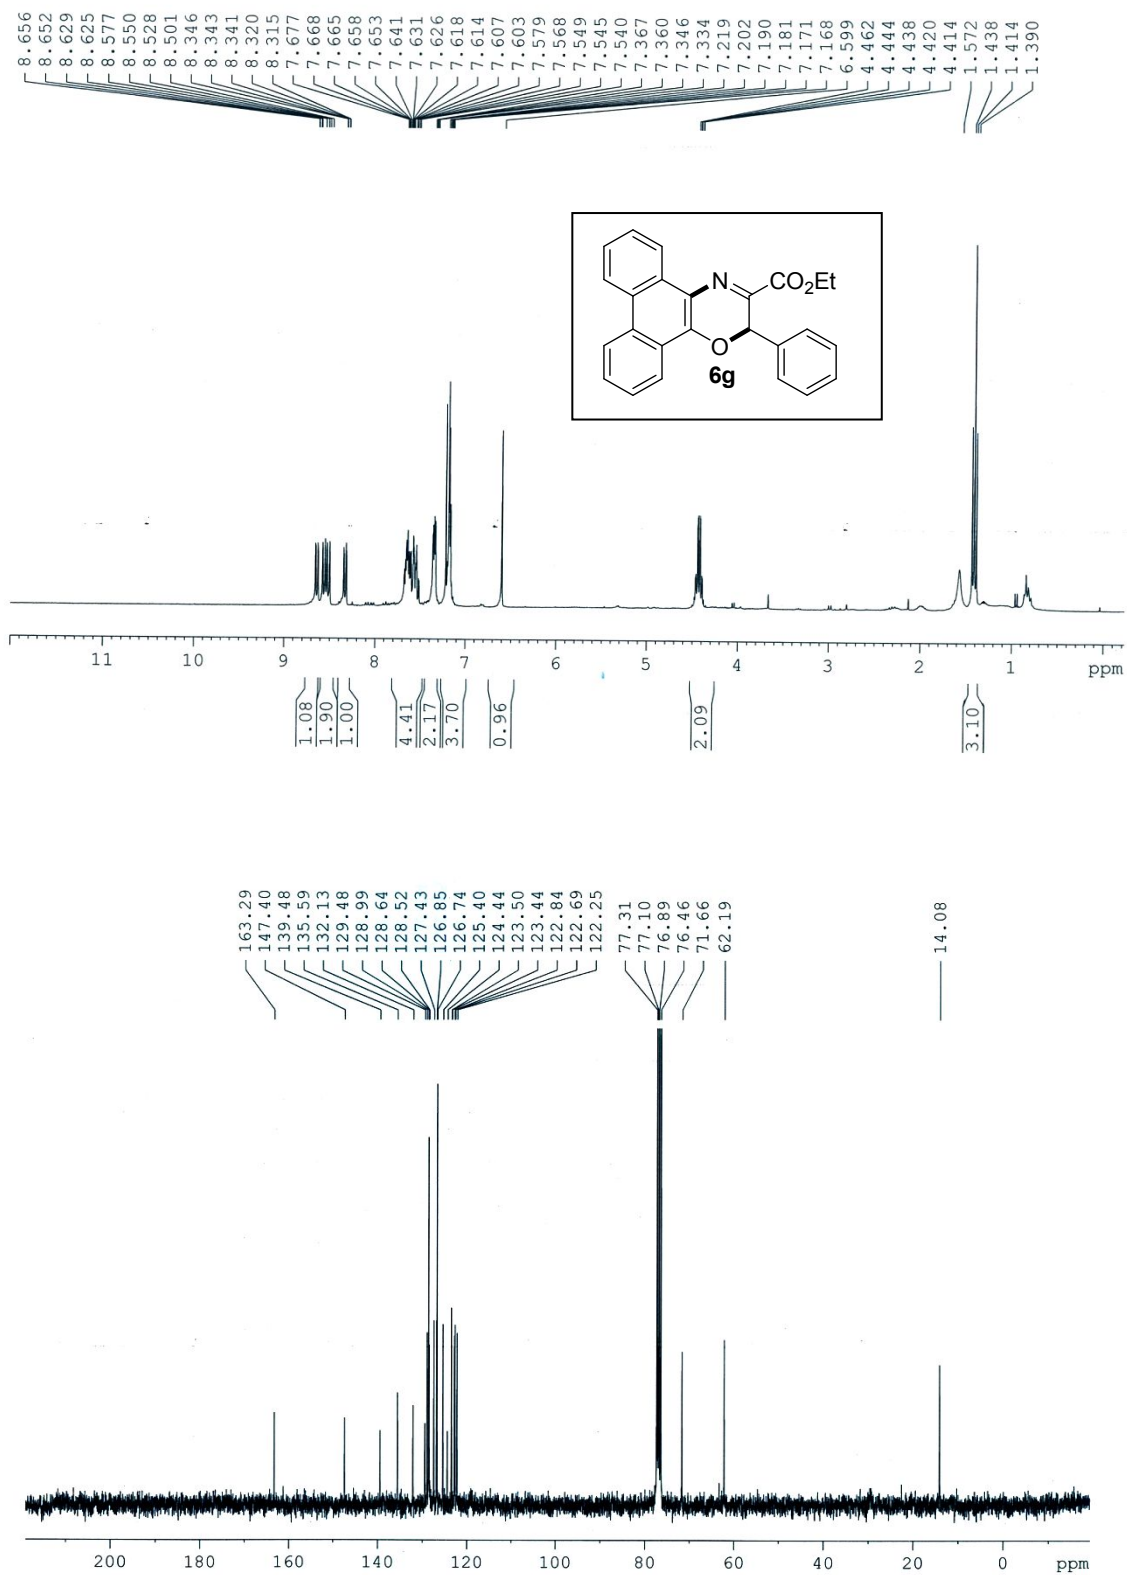

Figure S26. <sup>1</sup>H and <sup>13</sup>C NMR of 6h

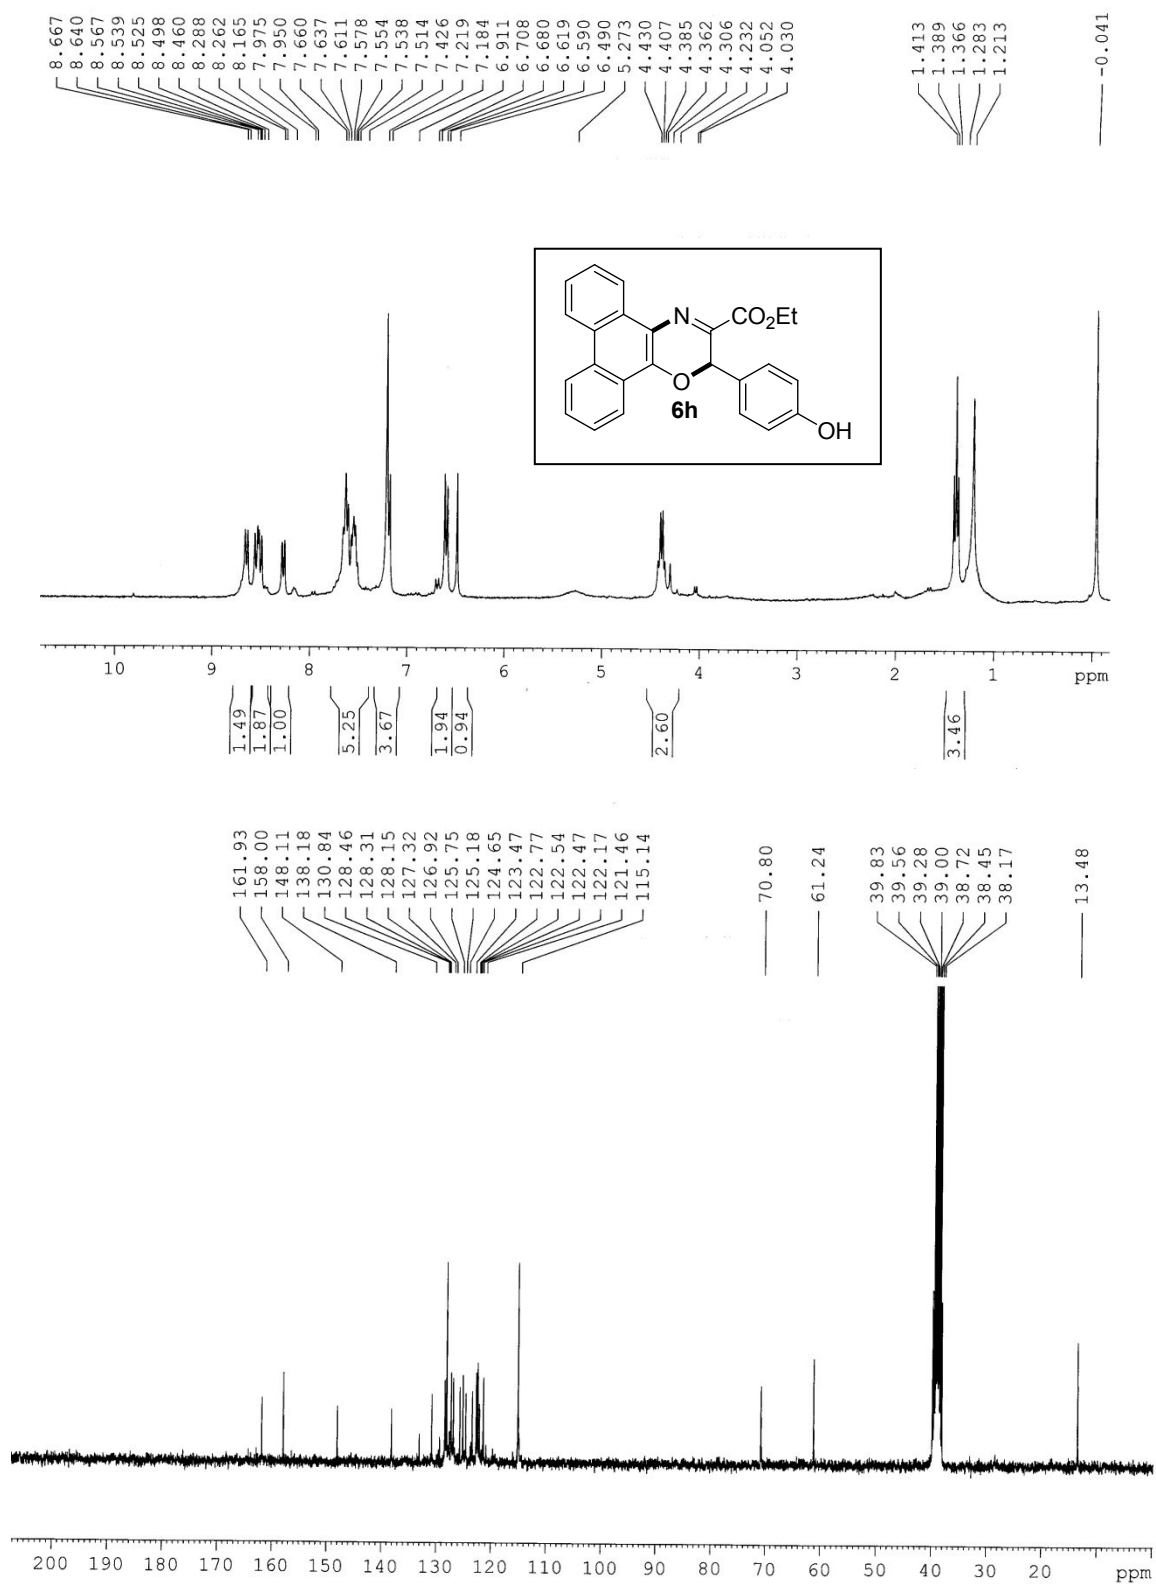

Figure S27.  $^1\text{H}$  and  $^{13}\text{C}$  NMR of **6i**

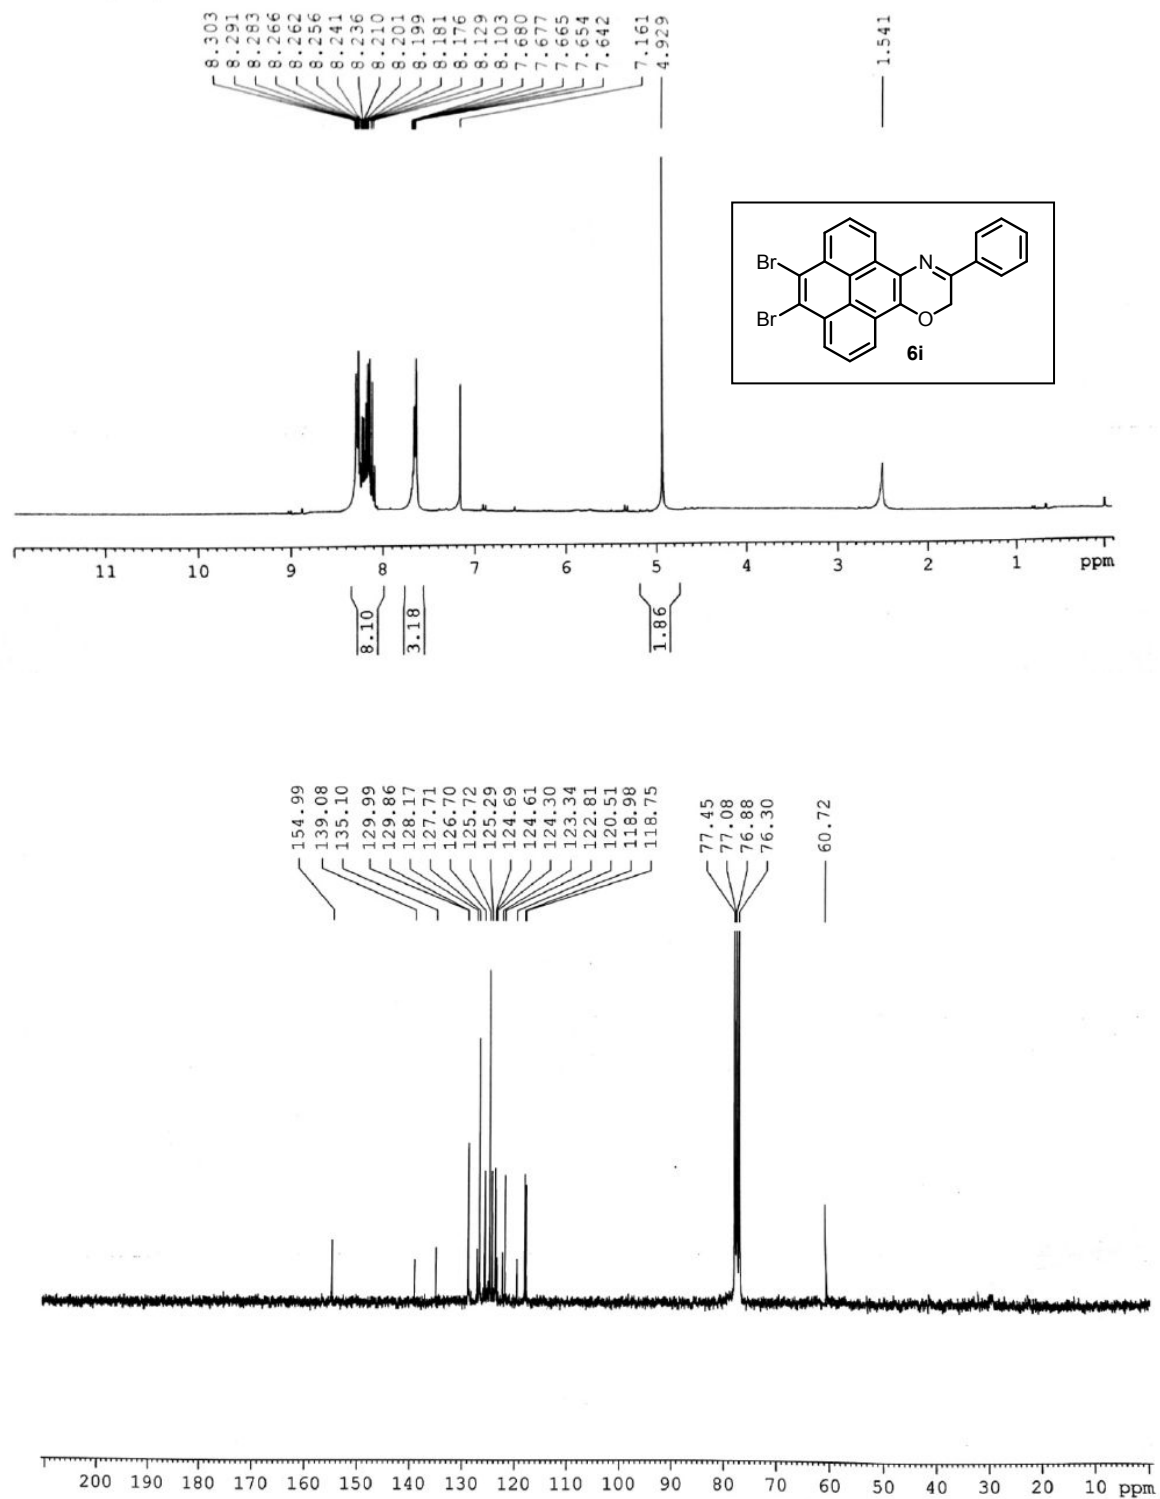

Figure S28.  $^1\text{H}$  and  $^{13}\text{C}$  NMR of 8a

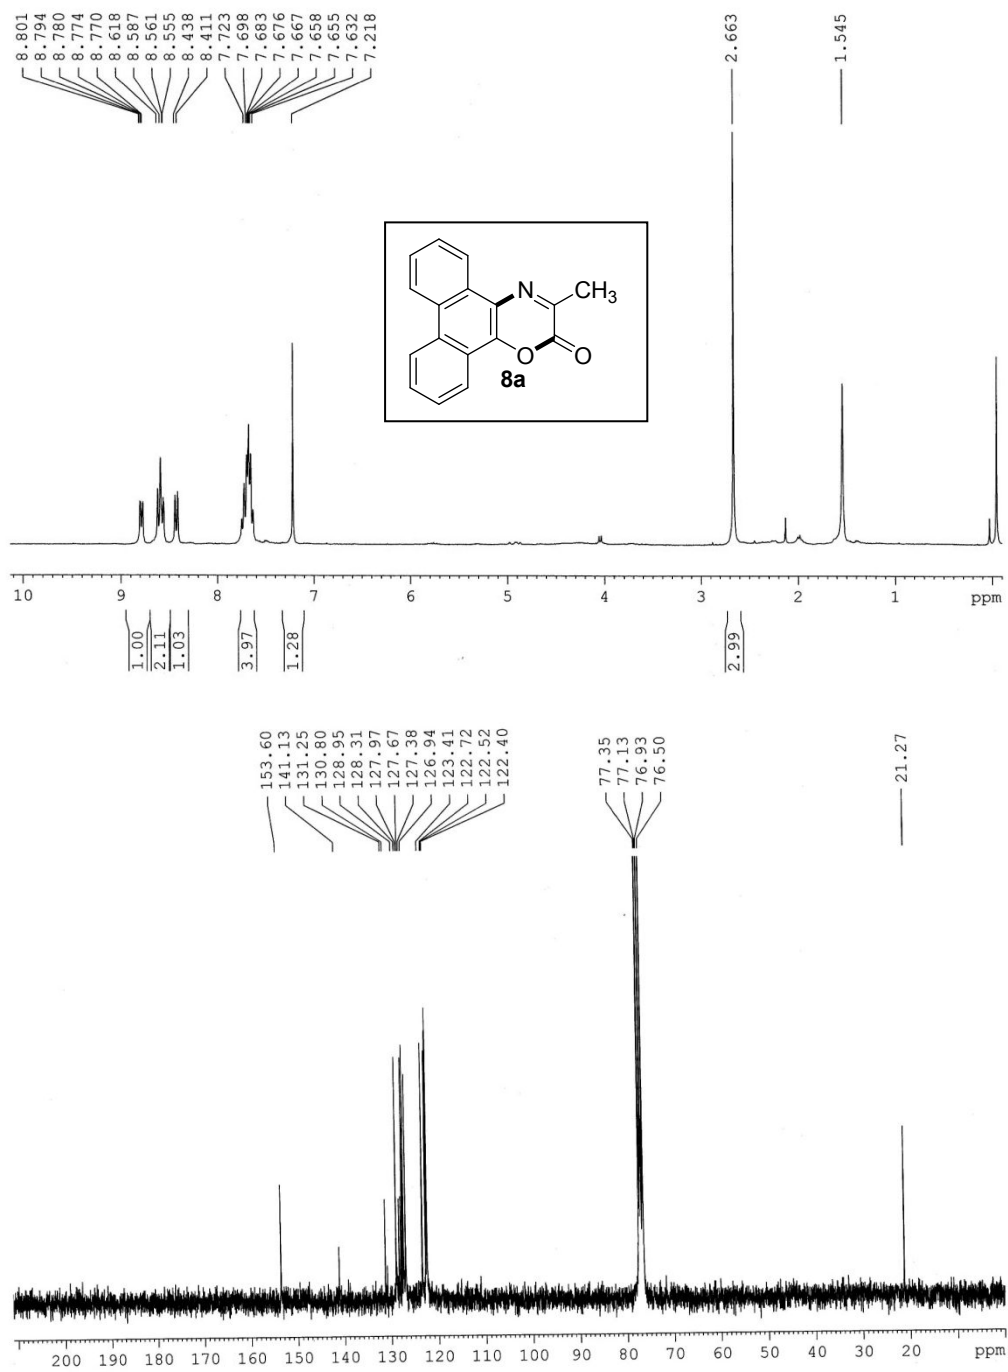

Figure S29.  $^1\text{H}$  and  $^{13}\text{C}$  NMR of **8b**

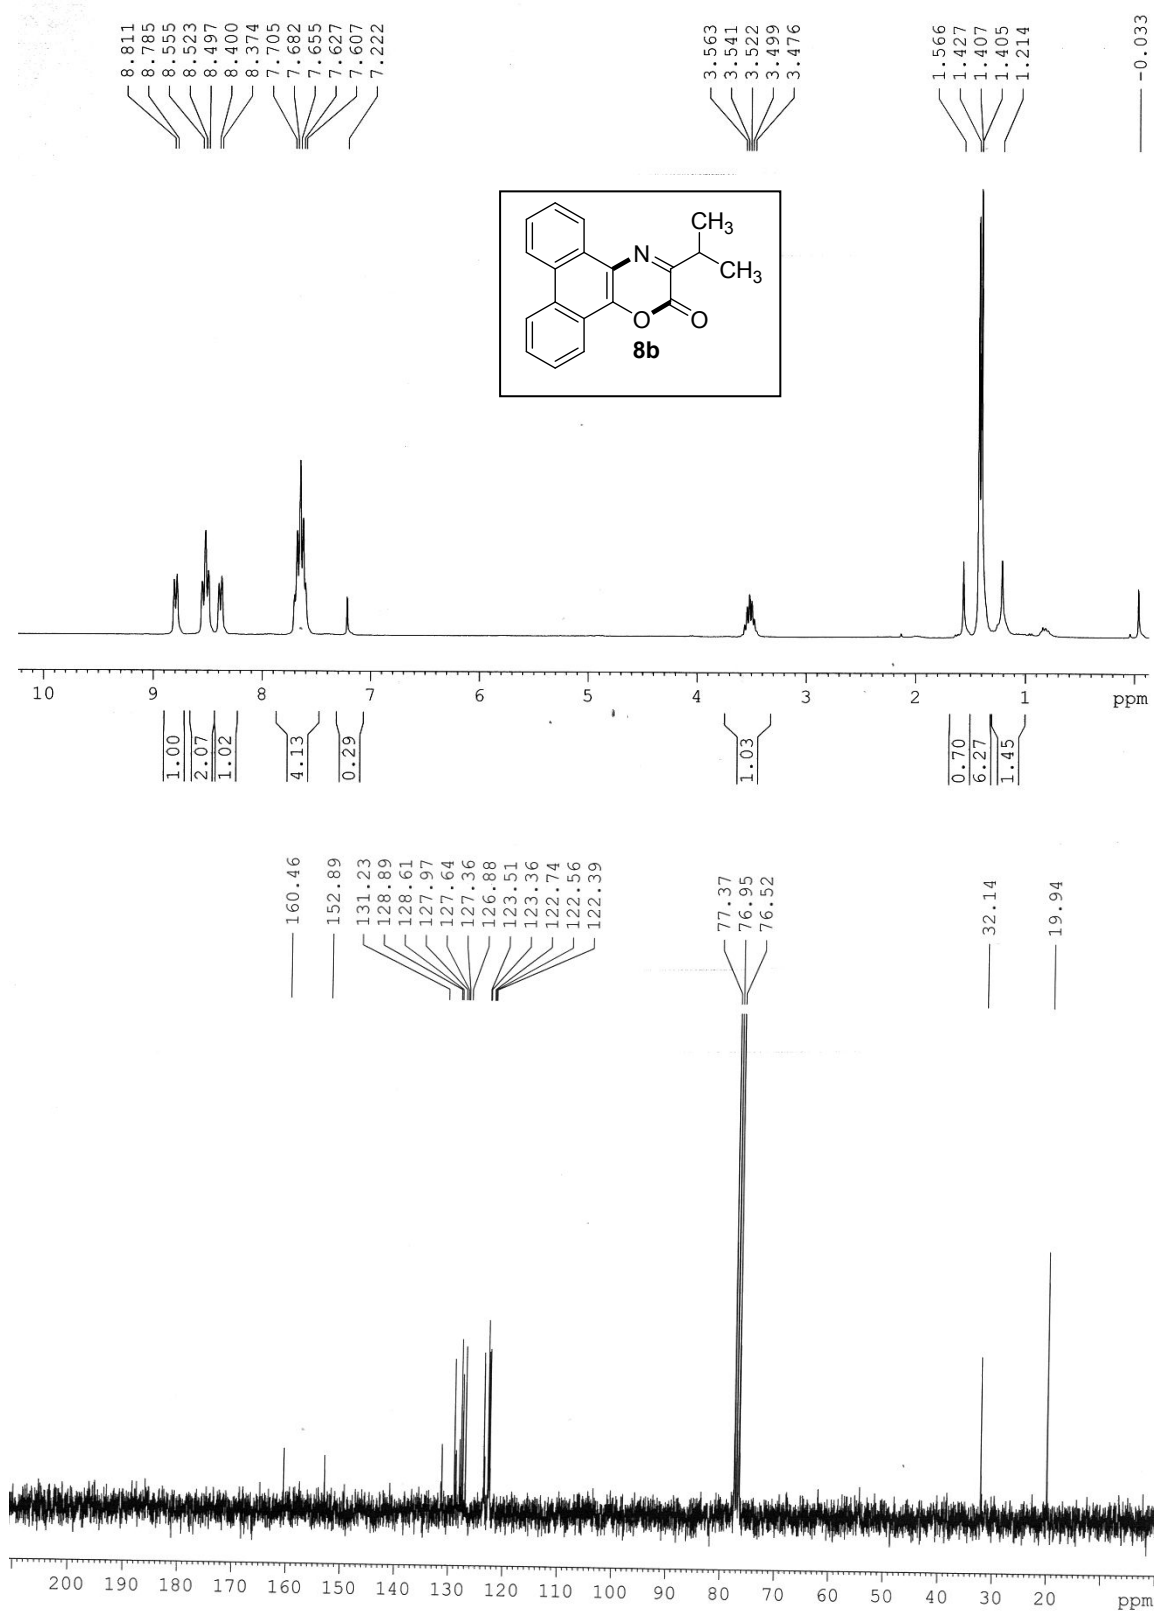

Figure S30.  $^1\text{H}$  and  $^{13}\text{C}$  NMR of **8c**

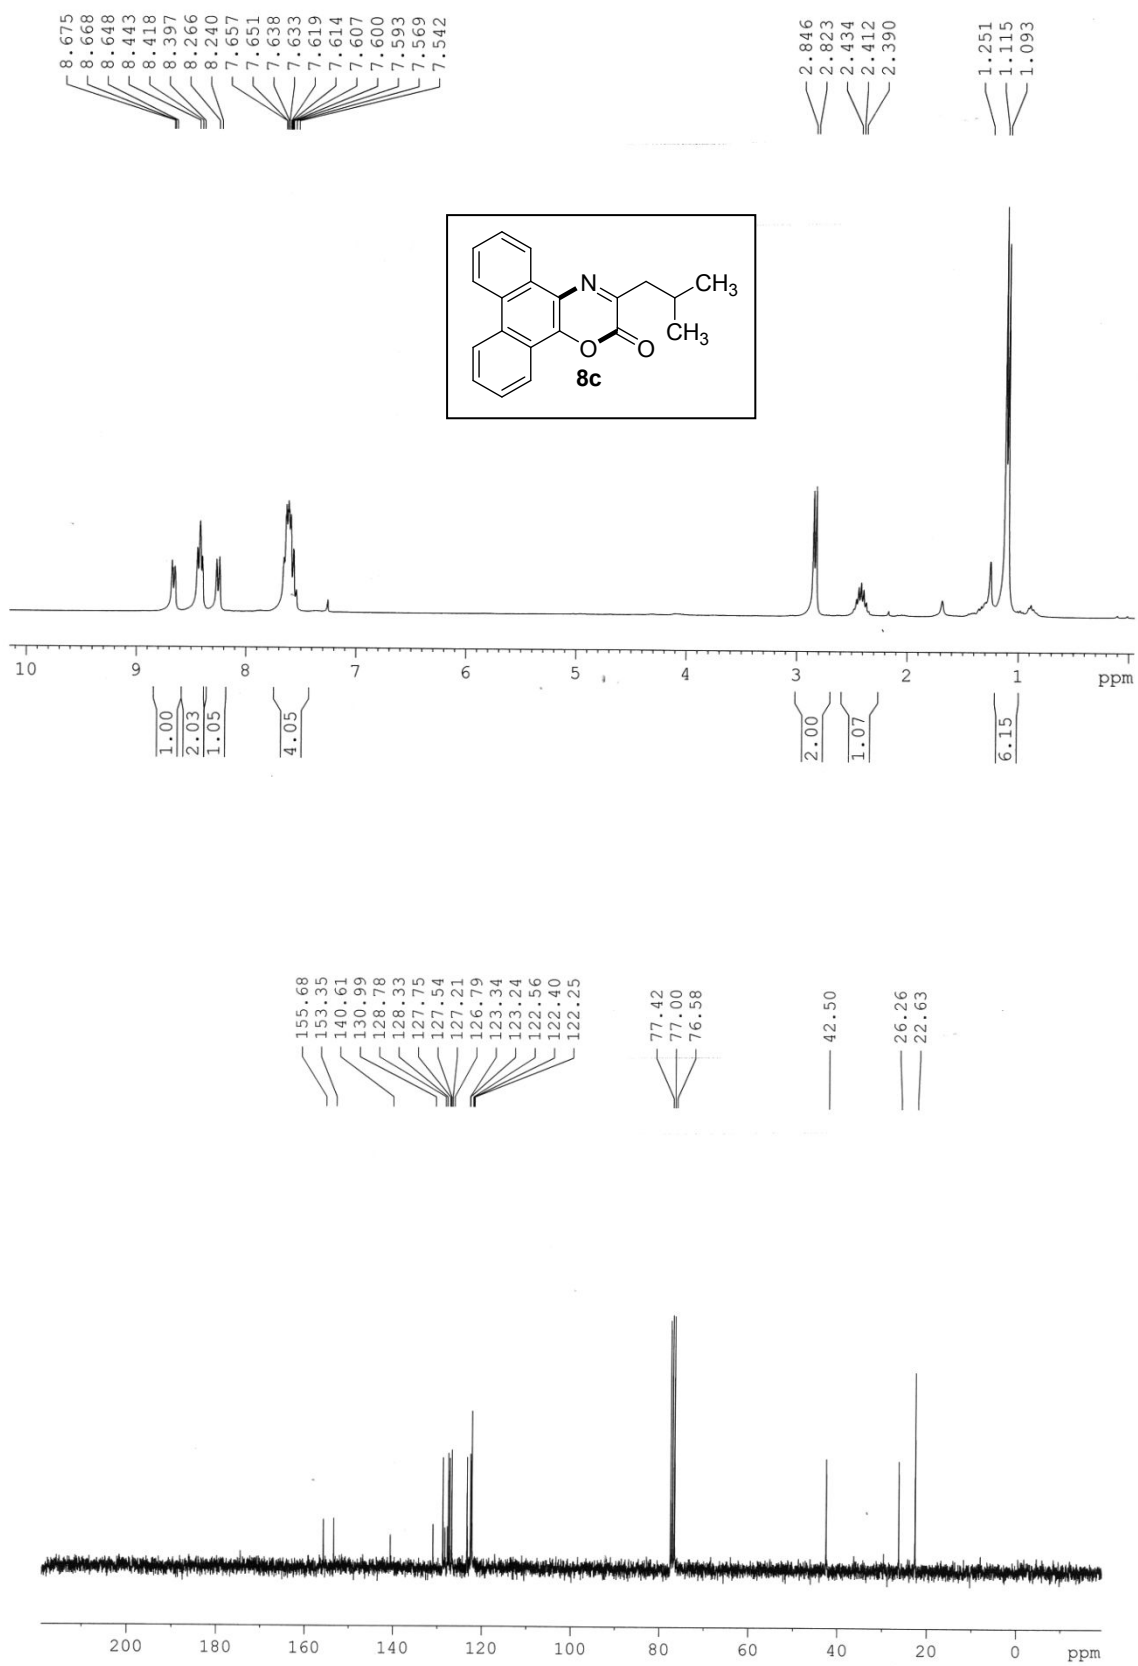

## Section II: X-ray diffraction data of compounds 4j and 6a

### X-ray diffraction data of 4j(CCDC 1551936)

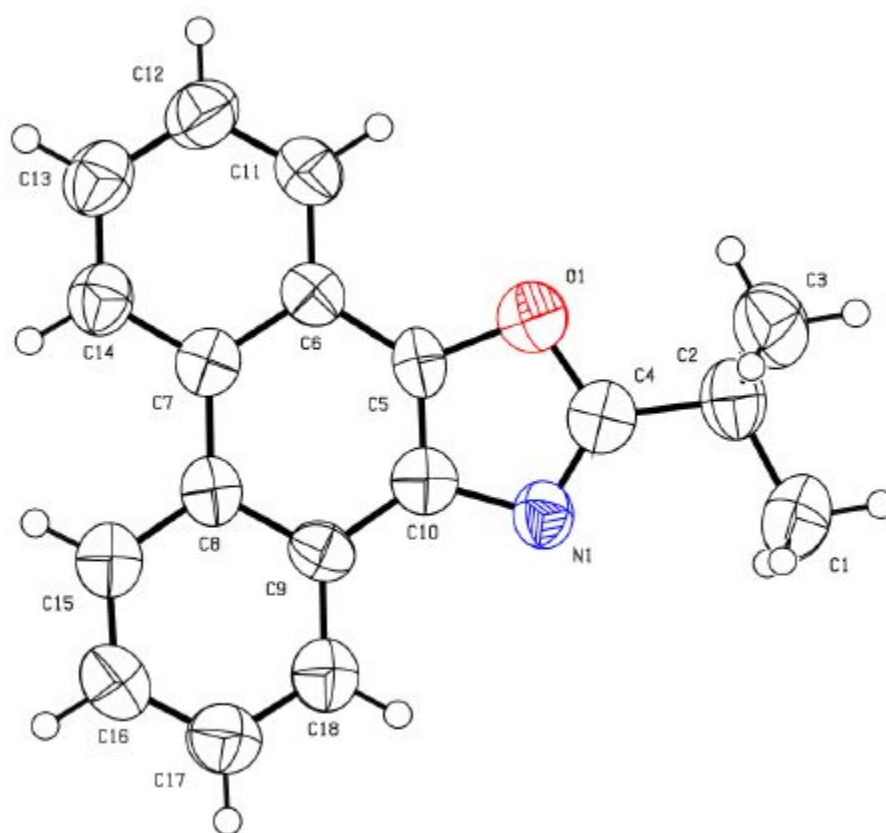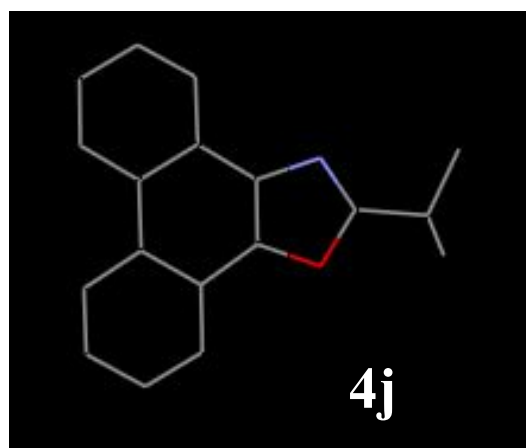

Figure S31. Thermal ellipsoid plot of 4j with ellipsoids at 50% of probability.





**X-ray diffraction data of 6a (CCDC 1551938)**

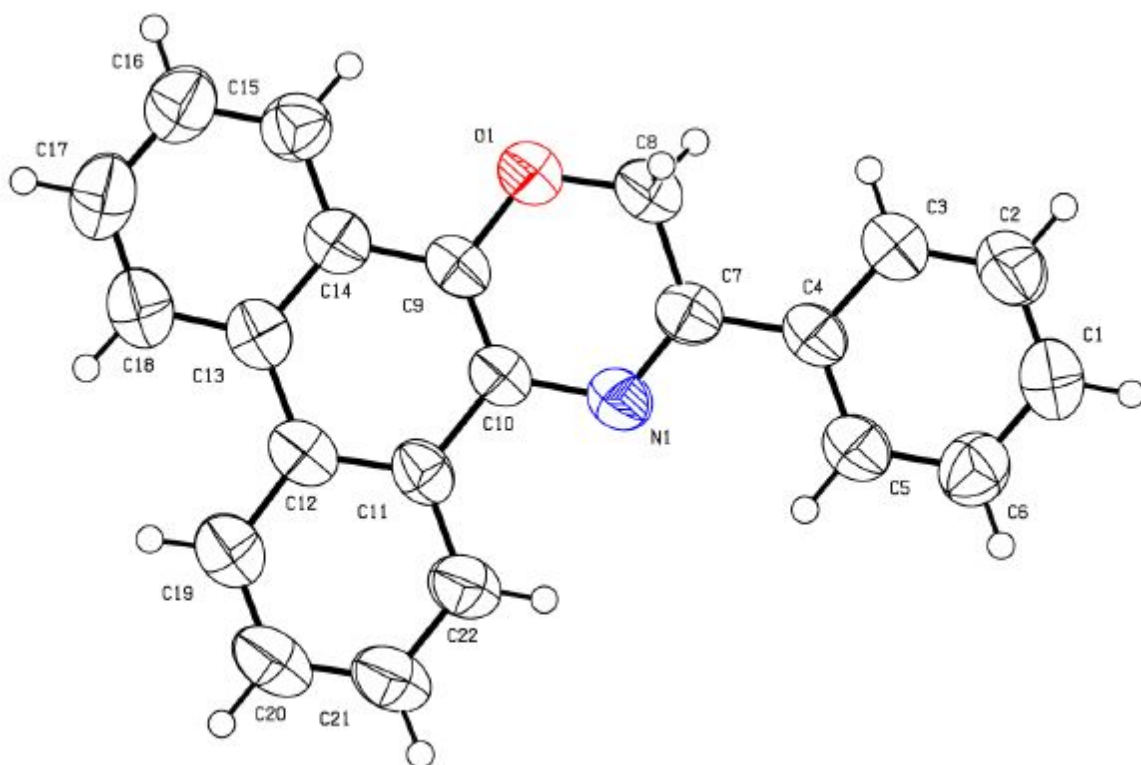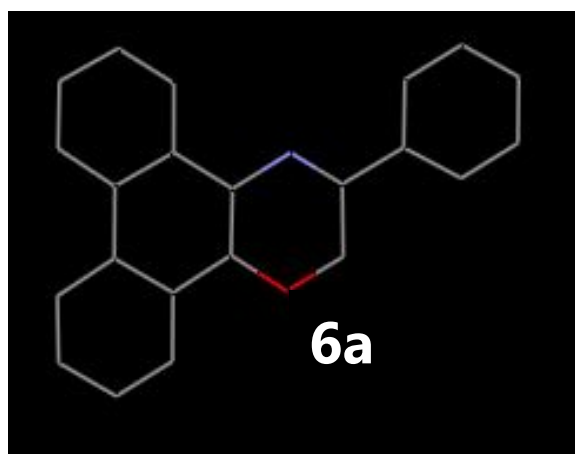

**Figure S32. Thermal ellipsoid plot of 6a with ellipsoids at 50% of probability.**



## Crystal structure experimental protocol:

Single crystal of compound **4j** and **6a** were mounted on a Bruker-AXS SMART APEX II diffractometer equipped with a graphite monochromator and Mo K $\alpha$  ( $\lambda = 0.71073 \text{ \AA}$ ) radiation. The crystal was placed 60 mm from the CCD, and frames (360) were measured with a counting time of 5s. The structures were solved using the Patterson method using the SHELXS 97 program. Non-hydrogen atoms were refined with independent anisotropic displacement parameters, while difference Fourier synthesis and least-squares refinement showed the positions of any remaining non-hydrogen atoms. The non-hydrogen atoms were refined with anisotropic thermal parameters. Successful convergence was indicated by the maximum shift/error of 0.001 for the last cycle of the least-squares refinement. All other crystallographic details such as h, k, l ranges,  $2\theta$  ranges, and R-factors can be found above (Table S1 and S2).

## Section III: Mass spectra data

Mass spectra were taken in infusion method.

### Parameters

Source - capillary (kv): 3.06, Sampling cone: 85, source offset: 80

Temp( $^{\circ}$ C) - Source: 120, Desolvation: 300

Gas flows– Cone gas (L/h) 50, Desolvation gas (L/h) 600, Lock spray capillary (kv) 2.50

### ESI-MS Study of the ongoing reaction

Herein, we have also carried out the HRMS study of the two reaction mixtures separately. In all cases a certain amount of aliquot was withdrawn from the reaction mixture which was subjected to mass analysis. The following spectra are the spectra of intermediates (**IA-B** and **IIIA-B**) and each of the spectrum is followed by their simulated pattern.

Figure S33. ESI-MS spectra of IA

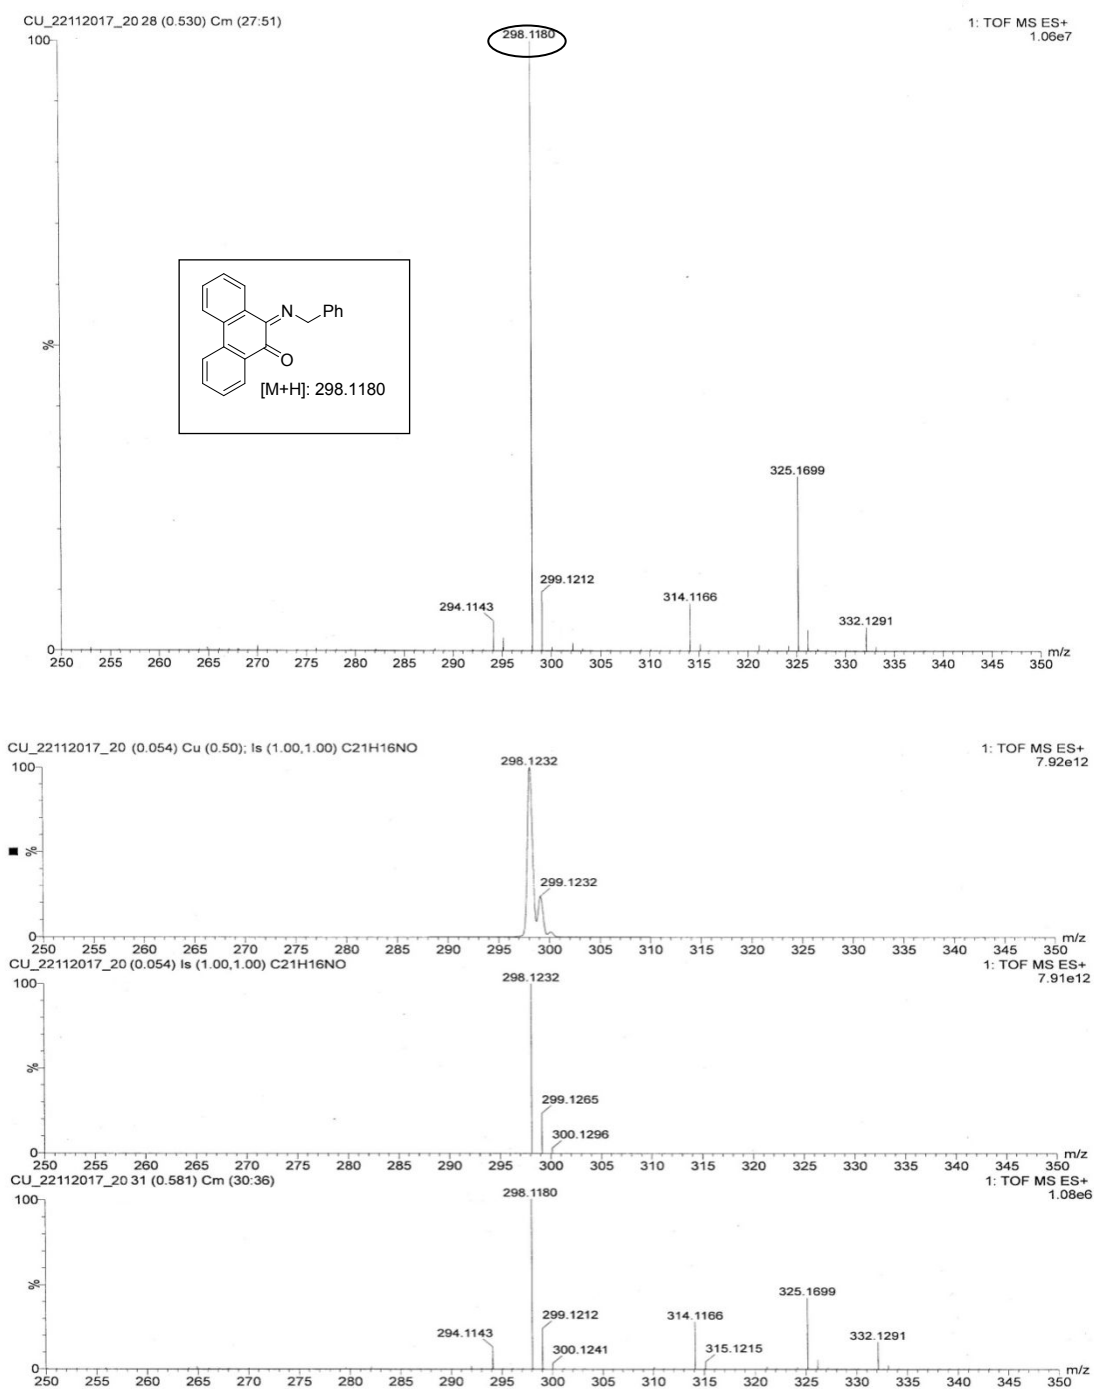

Figure S34. ESI-MS spectra of IB

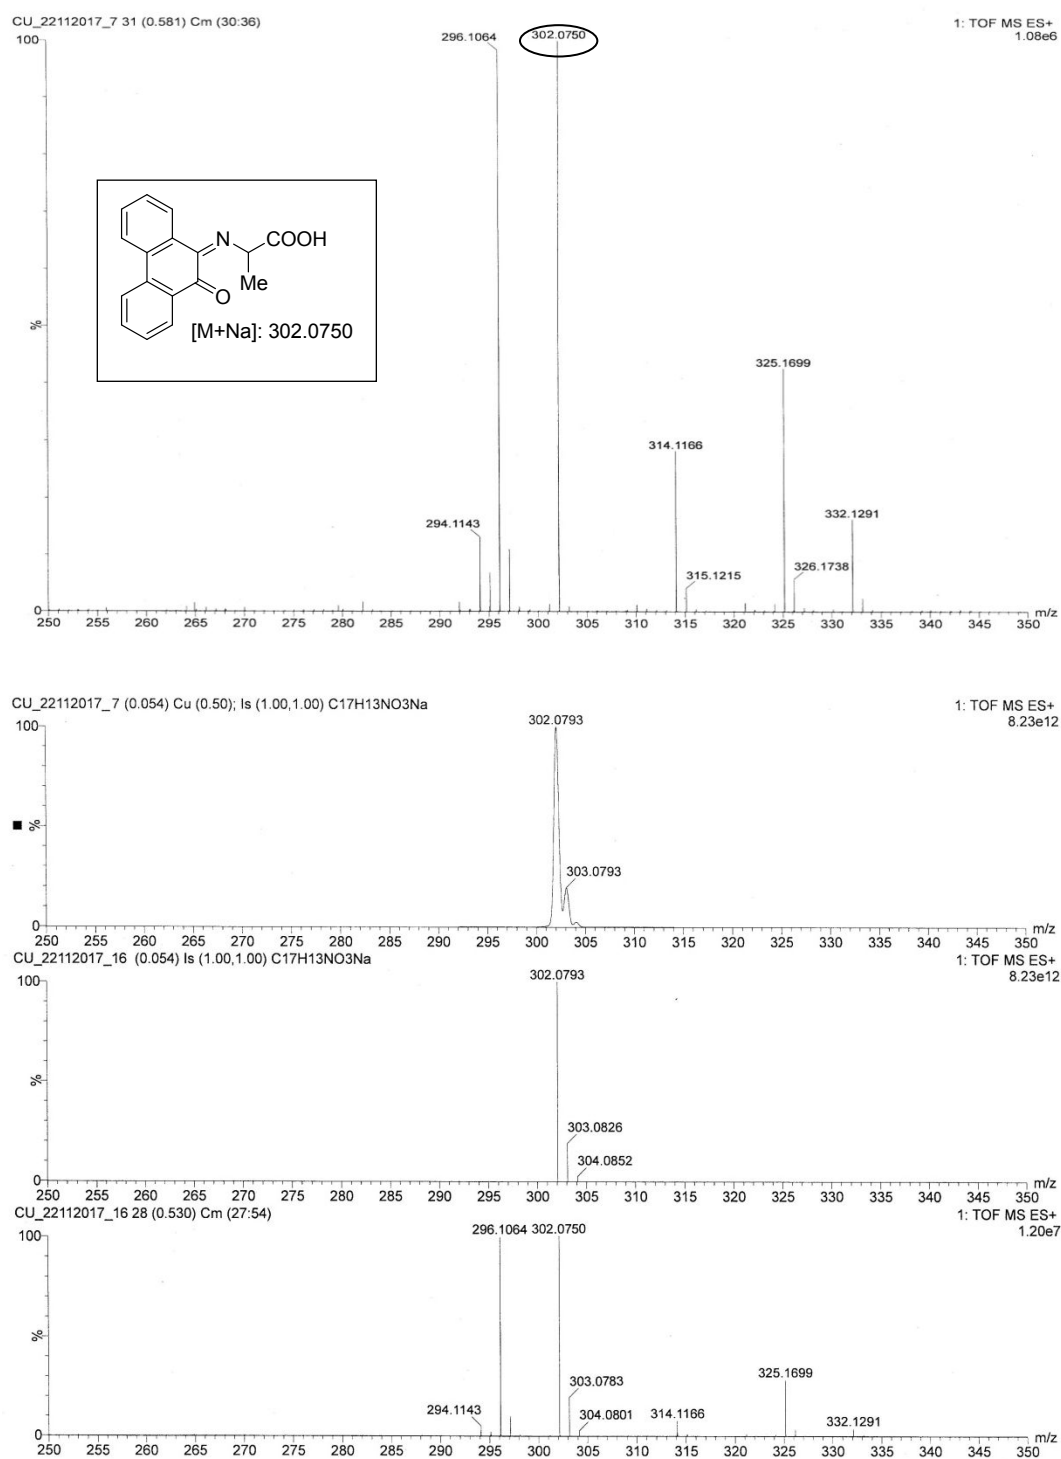

Figure S35. ESI-MS spectra of IIIA

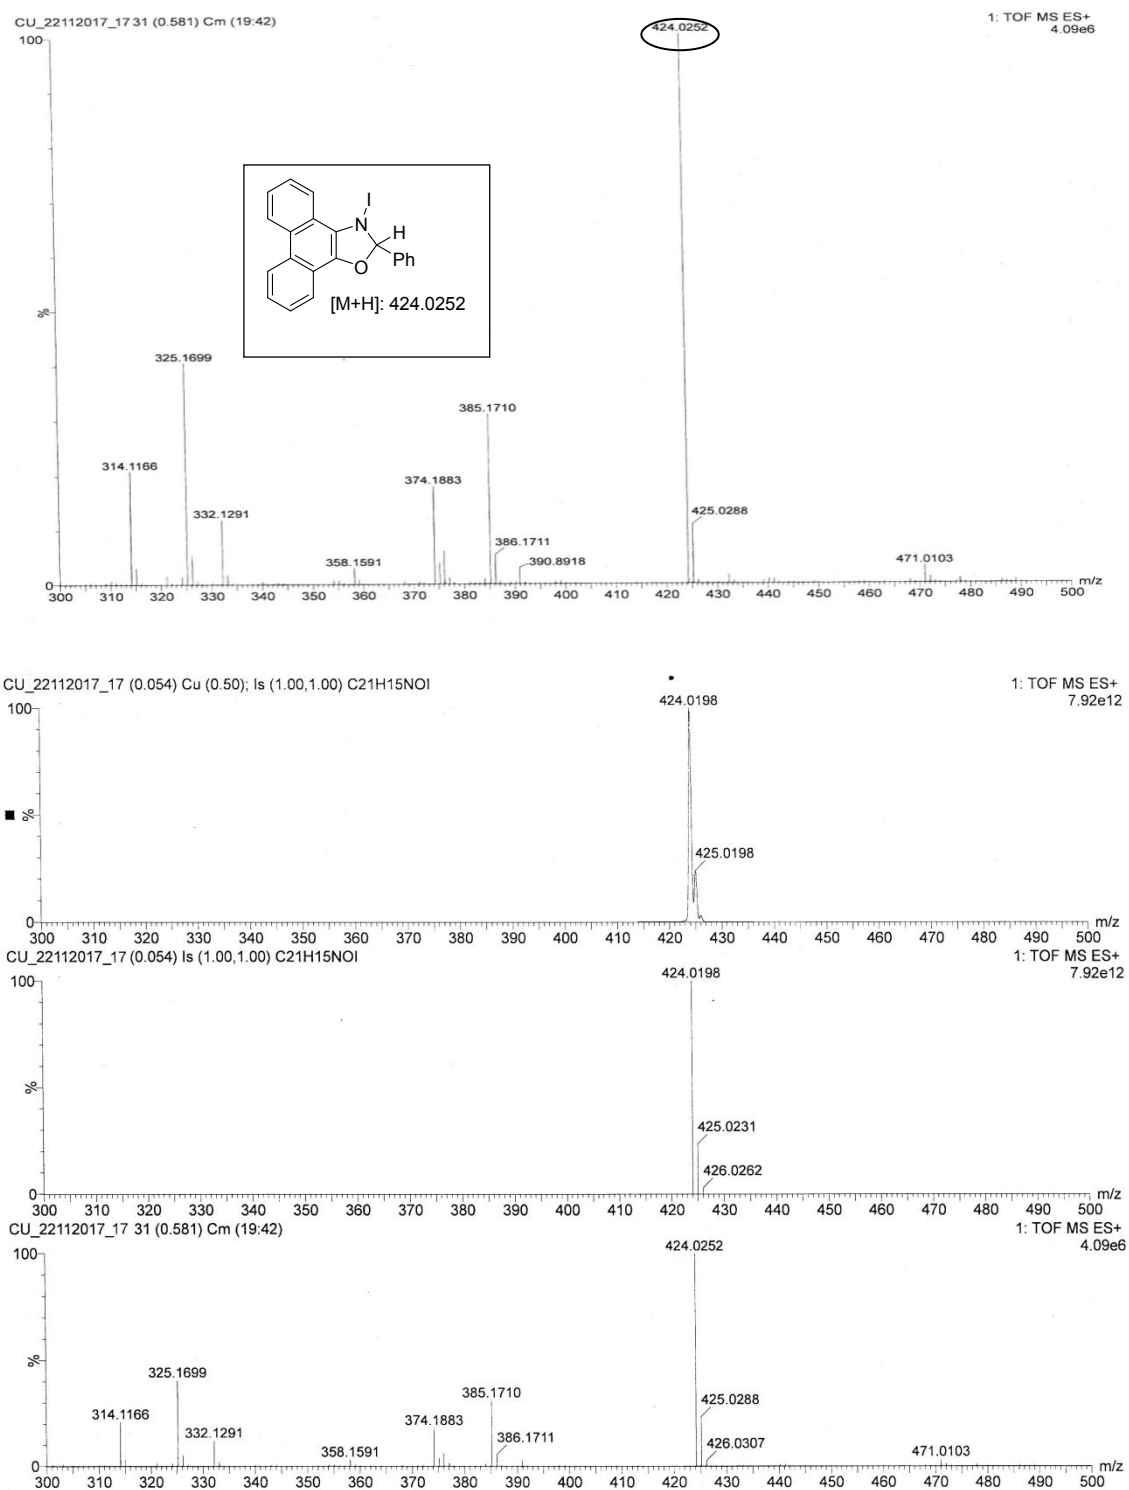

**Figure S36. ESI-MS spectra of IIIB**

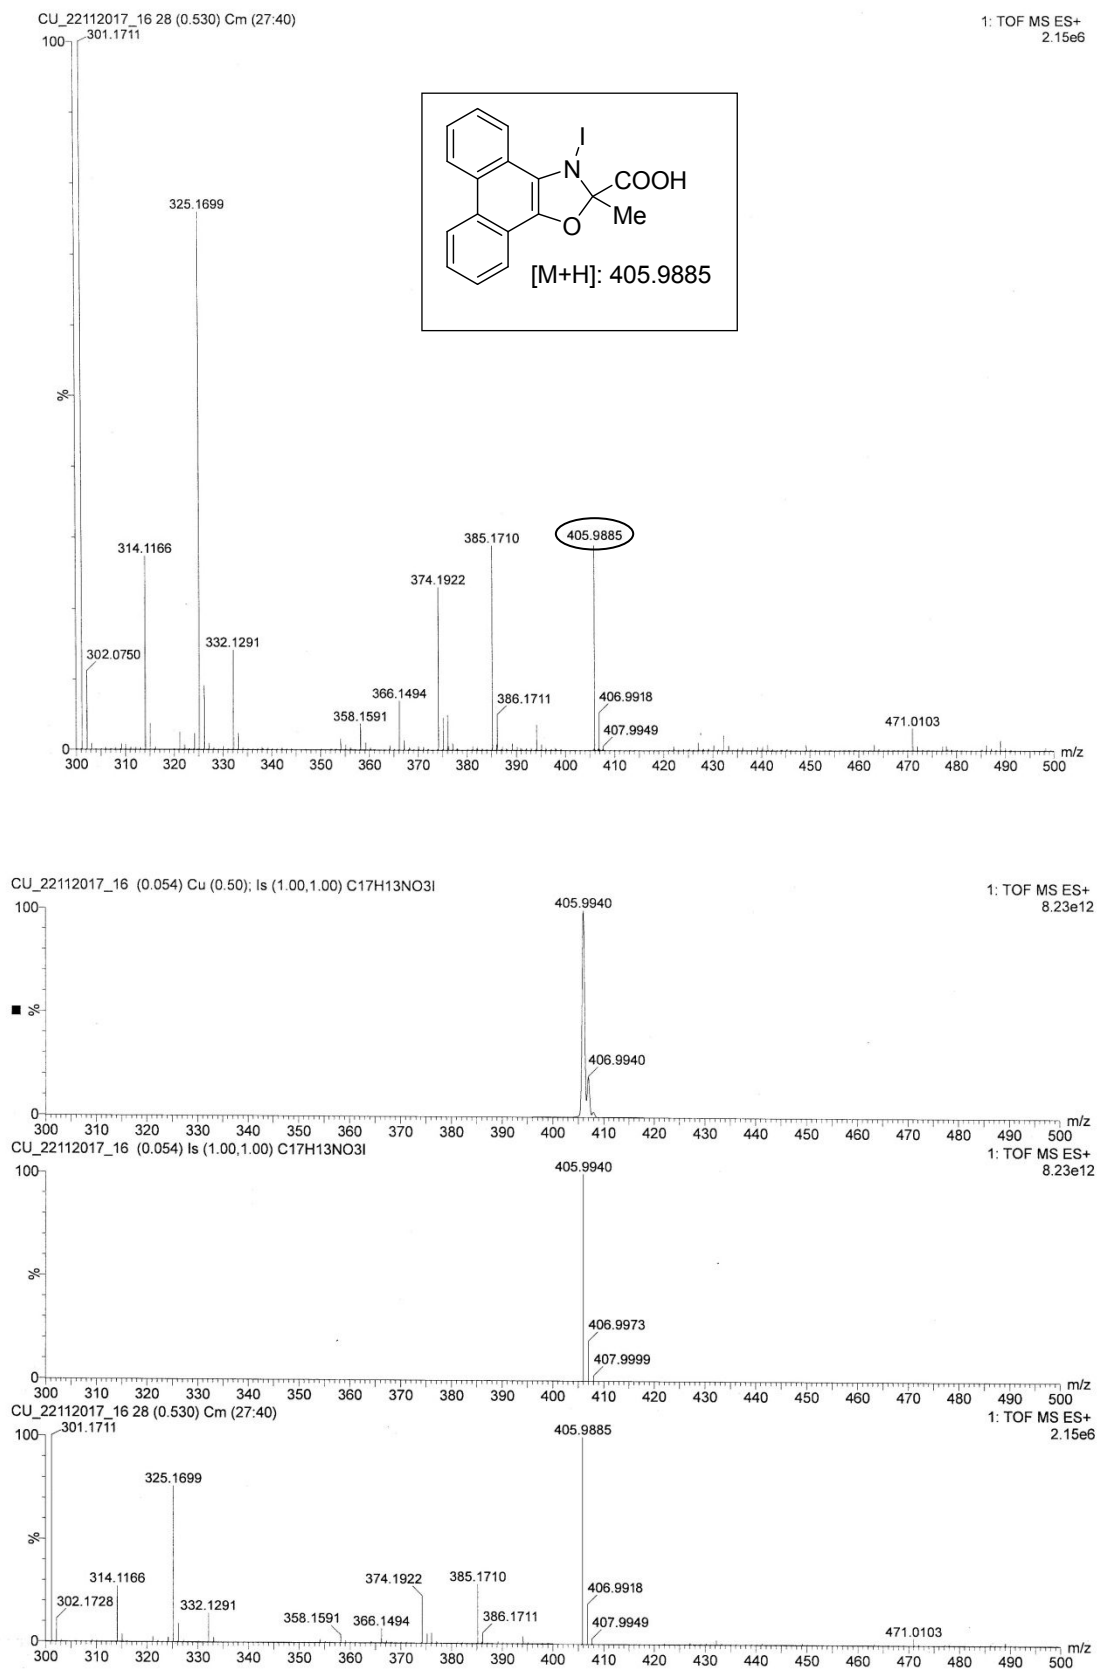

Supplement: ao9b03501_si_001.pdf [file ao9b03501_si_001.pdf]
